# Supplementary material for: Population genomics of Mesolithic Scandinavia: Investigating early postglacial migration routes and high-latitude adaptation
Source: PubMed Central journal article supplement (PMC5760011; doi:10.1371/journal.pbio.2003703), 2018-01-09

D(Chimp, X; SHG\_swe, SHG\_nor)

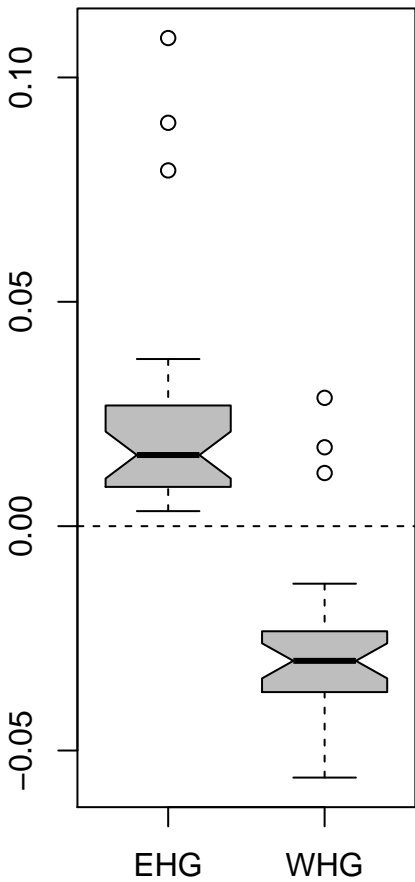

Supplement: pbio.2003703.s003.pdf [file pbio.2003703.s003.pdf]
