# Supplementary material for: Population genomics of Mesolithic Scandinavia: Investigating early postglacial migration routes and high-latitude adaptation
Source: PubMed Central journal article supplement (PMC5760011; doi:10.1371/journal.pbio.2003703), 2018-01-09

**French**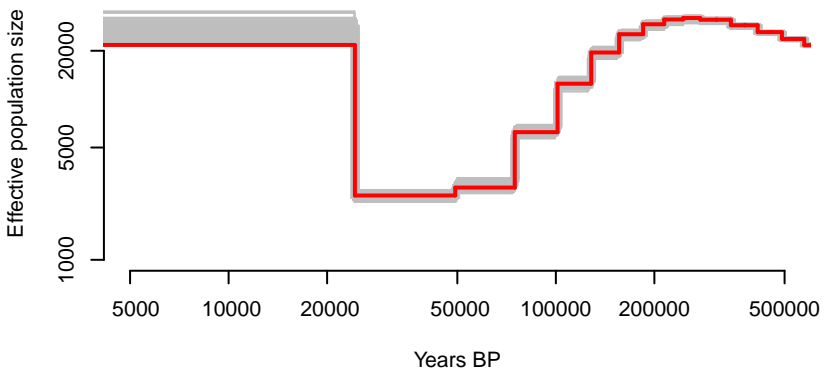**Sardinian**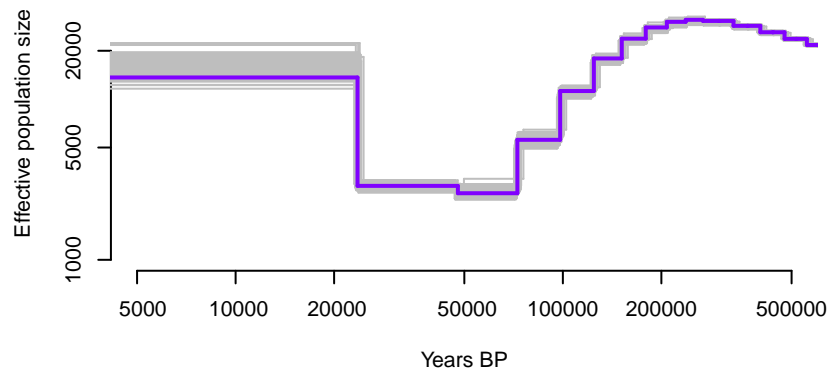**Karitiana**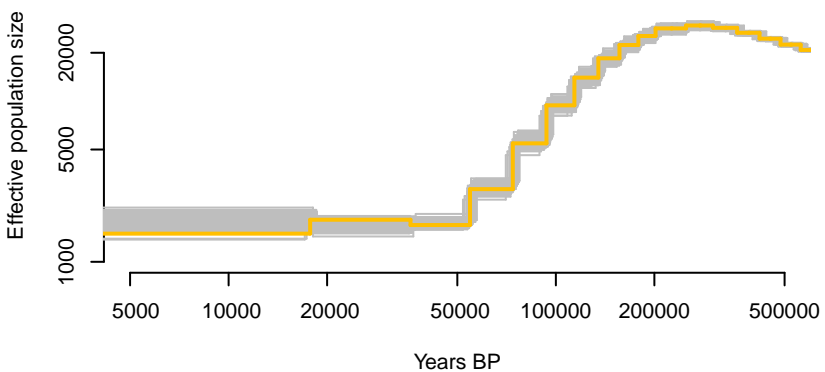**Yoruba**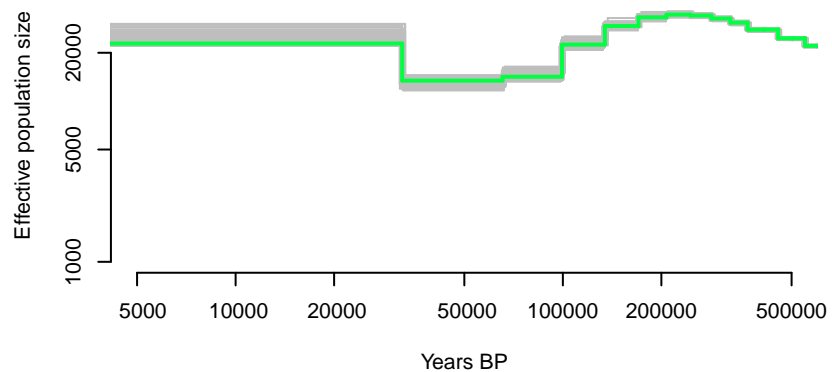**Stuttgart**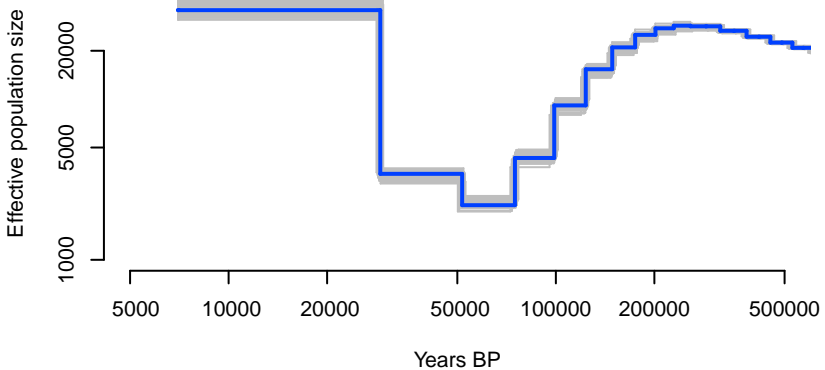**Ust-Ishim**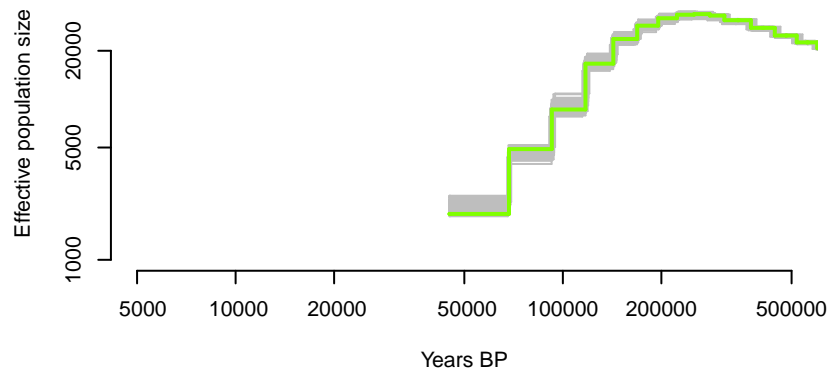**Loschbour**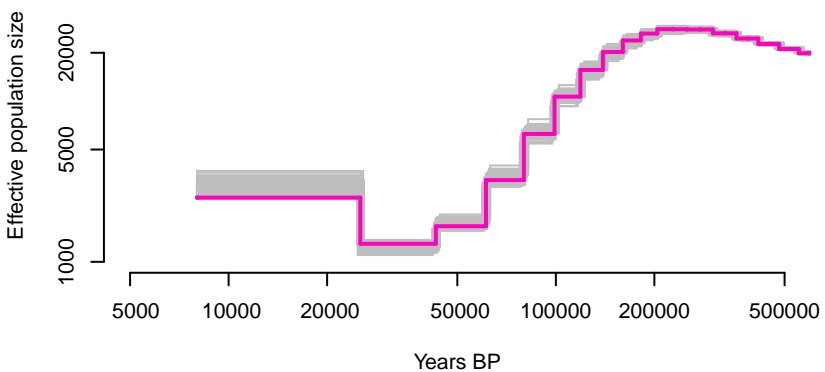**SF12**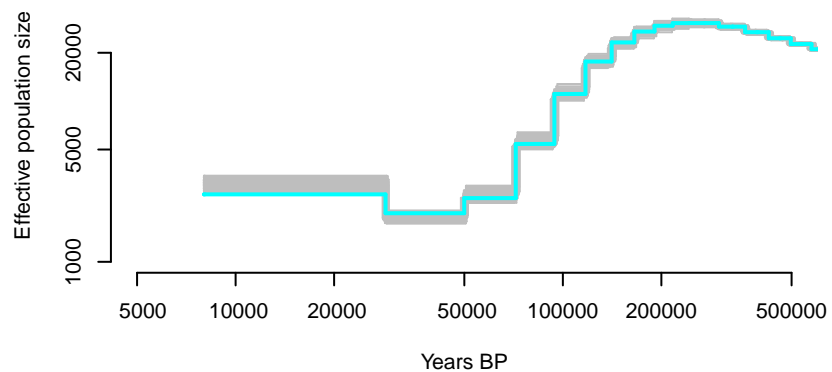

Supplement: pbio.2003703.s005.pdf [file pbio.2003703.s005.pdf]
