# Supplementary material for: Population genomics of Mesolithic Scandinavia: Investigating early postglacial migration routes and high-latitude adaptation
Source: PubMed Central journal article supplement (PMC5760011; doi:10.1371/journal.pbio.2003703), 2018-01-09
Supplement: pbio.2003703.s007.pdf [file pbio.2003703.s007.pdf]

## S2 Details on DNA Sample preparation

**Table S2.1** Summary of the lab work and results from sequencing of the Mesolithic samples.

| Sample name        | Bone element                                  | Number of Extracts | Number of libraries | Average read length | Average non-duplicate proportion human [%] (Minimum mapping quality 30) |
|--------------------|-----------------------------------------------|--------------------|---------------------|---------------------|-------------------------------------------------------------------------|
| Hum1               | Left 2nd maxillary incisor                    | 2                  | 10                  | 60.639              | 3.4                                                                     |
| Hum2               | Left 1st maxillary molar                      | 1                  | 5                   | 82.9063             | 5.6                                                                     |
| Steigen            | Mandibular molar                              | 1                  | 1                   | 92.821              | 26.8                                                                    |
| SF9                | Parietal bone, Os coxae                       | 8                  | 29                  | 74.447              | 3.1                                                                     |
| SF11               | Tibia                                         | 4                  | 11                  | 79.8543             | 1.7                                                                     |
| SF12_damage repair | Femur                                         | 126*               | 258                 | 74.977              | 14.7                                                                    |
| SF12               | Femur                                         | 15                 | 25                  | 70.9709             | 6.8                                                                     |
| SBJ                | Teeth, right M1 and M2 and M3 mandible, Tibia | 5                  | 15                  | 78.5173             | 3.4                                                                     |

\*This includes the initial 15 extracts for which also non-damage repair libraries were built.

**Table S2.2** Summary of two Ajvide samples previously published in Skoglund *et al.* [1] for which additional data was generated.

| Sample | Average read length | Genome coverage | Mitochondrial coverage | Genetic sex | Mitochondrial contamination estimate |                   |                   |               |           |            |
|--------|---------------------|-----------------|------------------------|-------------|--------------------------------------|-------------------|-------------------|---------------|-----------|------------|
|        |                     |                 |                        |             | Point estimate                       | Informative sites | Consensus alleles | Total alleles | Lower C.I | Higher C.I |
| Ajv58  | 64.386              | 2.70            | 378.97                 | XY          | 2.90                                 | 5                 | 1505              | 1550          | 2.07      | 3.74       |
| Ajv70  | 61.365              | 1.34            | 108.56                 | XY          | 1.61                                 | 5                 | 551               | 560           | 0.57      | 2.65       |

The endogenous DNA content in an ancient sample can vary greatly between different bone elements, as observed in [2,3], however even within the same bone element the proportion of endogenous DNA can vary [4,5]. Here we make the same observation, even though all extracts were generated from powder sampled from a 10cm<sup>2</sup> area of the femur the proportion of human DNA varied between 2 and 14%, except for a few extracts where some of the libraries generated were subjected to WGC show an average human proportion of 20% (Table S2.3). The average proportion of human DNA for each extract was calculated after removal of duplicates.

**Table S2.3** proportion of human DNA and average read length for extracts for which damage repair was done.

| Extract | Non-duplicate human proportion | Read length |
|---------|--------------------------------|-------------|
| f1      | 0.0568636598                   | 72.0681     |
| f2      | 0.0655421383                   | 75.6630625  |
| g1      | 0.0487412387                   | 75.95864    |
| g2      | 0.0582619406                   | 78.7907875  |
| h1      | 0.0742552347                   | 73.45664    |
| h2      | 0.0851679098                   | 79.2090625  |
| i1      | 0.0388759714                   | 74.79602    |
| i2      | 0.0434989209                   | 75.993525   |

|    |              |               |
|----|--------------|---------------|
| j1 | 0.0389066373 | 71.93756      |
| j2 | 0.0514995509 | 71.1007875    |
| k1 | 0.0319647247 | 74.22806      |
| k2 | 0.0381907159 | 76.683275     |
| l1 | 0.0302095219 | 75.86332      |
| l2 | 0.0335597919 | 76.181225     |
| m1 | 0.0496837664 | 81.58628      |
| m2 | 0.0605230021 | 79.3211625    |
| n1 | 0.0376078974 | 71.80102      |
| n2 | 0.0747283112 | 75.343825     |
| o1 | 0.0271022471 | 73.86608      |
| o2 | 0.032300346  | 76.2626375    |
| s  | 0.0102179429 | 68.3368       |
| q  | 0.0194859721 | 74.2623571429 |
| t1 | 0.0553612316 | 78.79745      |
| t2 | 0.0562593462 | 83.47505      |
| t3 | 0.0475910668 | 76.0176666667 |
| t4 | 0.0415985974 | 86.1800888889 |
| t5 | 0.0243231032 | 76.9118125    |
| t6 | 0.0310185891 | 75.2801111111 |
| t7 | 0.0189539249 | 74.9423777778 |
| t8 | 0.0352912319 | 81.48415      |
| u1 | 0.0339274622 | 78.7452166667 |
| u2 | 0.0295915419 | 80.1884916667 |
| u3 | 0.0337740423 | 78.258825     |
| u4 | 0.0627580416 | 77.1813846154 |
| u5 | 0.0571196928 | 66.2621888889 |
| u6 | 0.0557168508 | 72.52325      |
| u7 | 0.0619772871 | 78.0147333333 |
| u8 | 0.042687556  | 76.3665142857 |
| v1 | 0.0894996154 | 86.7739166667 |
| v2 | 0.0716081869 | 81.0637125    |
| v3 | 0.0436063595 | 88.65478      |
| v4 | 0.0425226296 | 78.1164625    |
| v5 | 0.0485653944 | 72.2904       |
| v6 | 0.0475934678 | 80.149575     |
| v7 | 0.0390909118 | 74.27605      |
| v8 | 0.0149852434 | 75.9553571429 |
| w1 | 0.0454193567 | 88.8353       |
| w2 | 0.0222316397 | 59.6168       |
| w3 | 0.0169109659 | 80.5732166667 |
| w4 | 0.0378082747 | 64.6882       |
| w5 | 0.0513133156 | 82.05932      |
| w6 | 0.0309709702 | 60.5789666667 |
| w7 | 0.0657496994 | 57.1689       |

|      |              |                |
|------|--------------|----------------|
| w8   | 0.0499932644 | 64.5477        |
| y1   | 0.0690055037 | 70.51875       |
| y2   | 0.0657477034 | 74.6471666667  |
| y3   | 0.0278241066 | 82.696825      |
| y4   | 0.0290456901 | 64.77865       |
| y5   | 0.0389971138 | 65.16305       |
| y7   | 0.0381935681 | 78.70615       |
| y8   | 0.0367056605 | 81.9648        |
| x1   | 0.0327776036 | 80.0742833333  |
| x2   | 0.0616322748 | 78.5798714286  |
| x3   | 0.0278713637 | 84.03546       |
| x4   | 0.0496015207 | 82.5797571429  |
| x5   | 0.0895367753 | 82.1414571429  |
| x6   | 0.0632386086 | 83.2141        |
| x7   | 0.0613428268 | 84.6820166667  |
| x8   | 0.1000110298 | 81.43512       |
| z1   | 0.0536108278 | 76.785975      |
| z2   | 0.050434322  | 85.89214       |
| z3   | 0.0450561749 | 79.46525       |
| z4   | 0.0511667235 | 78.0629        |
| z5   | 0.0315288233 | 86.9599333333  |
| z6   | 0.0521637816 | 68.0875        |
| z7   | 0.058310996  | 73.6346        |
| z8   | 0.0833501902 | 70.0847666667  |
| ls01 | 0.0394372544 | 83.9703        |
| ls02 | 0.0532810862 | 86.9569333333  |
| ls03 | 0.0574895137 | 81.6832        |
| ls04 | 0.0350745193 | 84.2945        |
| ls05 | 0.0661043144 | 103.8751333333 |
| ls06 | 0.0677302422 | 85.0050666667  |
| ls07 | 0.0756146962 | 91.6787666667  |
| ls08 | 0.0534335421 | 85.5634666667  |
| ls09 | 0.077843796  | 87.8827        |
| ls10 | 0.0690244817 | 79.72172       |
| ls11 | 0.032577006  | 100.4325333333 |
| ls12 | 0.04943783   | 106.5389333333 |
| ls13 | 0.0678540753 | 92.67056       |
| ls14 | 0.0746394852 | 92.49592       |
| ls15 | 0.1008940535 | 86.22418       |
| ls16 | 0.0622933008 | 97.734925      |
| ls17 | 0.0489750257 | 95.362         |
| ls18 | 0.0473854069 | 93.418975      |
| ls19 | 0.0543604918 | 104.4772       |
| ls20 | 0.0478468645 | 93.2154        |
| ls21 | 0.019070989  | 89.3835333333  |

|      |              |               |
|------|--------------|---------------|
| ls22 | 0.0323669834 | 83.7892       |
| ls23 | 0.0224001226 | 93.5419666667 |
| ls24 | 0.0219683976 | 83.1180666667 |
| ls25 | 0.0598419126 | 81.68712      |
| ls26 | 0.0581526455 | 72.48468      |
| ls27 | 0.0496427629 | 76.380025     |
| ls28 | 0.0391103919 | 79.221575     |
| ls29 | 0.0364761661 | 75.604925     |
| ls30 | 0.0285452055 | 82.5539666667 |
| ls31 | 0.0525504216 | 75.4277625    |
| ls32 | 0.0523450033 | 72.78292      |
| ls33 | 0.0383775415 | 71.79542      |
| ls34 | 0.0444801881 | 66.2718       |
| ls35 | 0.0368812536 | 72.338        |
| ls36 | 0.0258846489 | 75.7962       |
| ls37 | 0.026390841  | 71.8117909091 |
| ls38 | 0.0184480892 | 74.56752      |
| ls39 | 0.0210260316 | 74.9166222222 |
| ls40 | 0.0215502871 | 72.8480333333 |
| em   | 0.0369780467 | 86.1493925581 |

## References

1. Skoglund P, Malmstrom H, Omrak A, Raghavan M, Valdiosera C, Gunther T, et al. Genomic Diversity and Admixture Differs for Stone-Age Scandinavian Foragers and Farmers. *Science*. 2014;344: 747–750. doi:10.1126/science.1253448
2. Pinhasi R, Fernandes D, Sirak K, Novak M, Connell S, Alpaslan-Roodenberg S, et al. Optimal Ancient DNA Yields from the Inner Ear Part of the Human Petrous Bone. *PLoS ONE*. 2015;10: e0129102. doi:10.1371/journal.pone.0129102
3. Gamba C, Jones ER, Teasdale MD, McLaughlin RL, Gonzalez-Fortes G, Mattiangeli V, et al. Genome flux and stasis in a five millennium transect of European prehistory. *Nature Communications*. 2014;5: 5257. doi:10.1038/ncomms6257
4. Seguin-Orlando A, Korneliussen TS, Sikora M, Malaspinas A-S, Manica A, Moltke I, et al. Genomic structure in Europeans dating back at least 36,200 years. *Science*. 2014;346: 1113–1118. doi:10.1126/science.aaa0114
5. Fu Q, Li H, Moorjani P, Jay F, Slepchenko SM, Bondarev AA, et al. Genome sequence of a 45,000-year-old modern human from western Siberia. *Nature*. 2014;514: 445–449. doi:10.1038/nature13810
