# Supplementary material for: Population genomics of Mesolithic Scandinavia: Investigating early postglacial migration routes and high-latitude adaptation
Source: PubMed Central journal article supplement (PMC5760011; doi:10.1371/journal.pbio.2003703), 2018-01-09
Supplement: pbio.2003703.s011.pdf [file pbio.2003703.s011.pdf]

# S6 Basic Population genomic analysis

## S6.1 Reference data for comparison

Most population genomic analyses require a set of reference data for comparison. We compiled three different data sets from the literature and merged them with the data from ancient individuals. The three reference SNP panels were (Table S6.1).

**Table S6.1** Merged SNPs with genotype datasets

| Individual      | Number of SNPs overlapping with Human Origins | Number of SNPs overlapping with Mathieson2015 capture SNPs | Number of SNPs overlapping with 1000 genomes transversions | Reference                                        |
|-----------------|-----------------------------------------------|------------------------------------------------------------|------------------------------------------------------------|--------------------------------------------------|
| Bichon          | 102540                                        | 299715                                                     | 1694024                                                    | Jones et al. (2015)                              |
| Kostenki14      | 65064                                         | 185278                                                     | 954417                                                     | Seguin-Orlando et al. (2014)                     |
| LaBranal        | 544119                                        | 958583                                                     | 1435555                                                    | Olalde et al. (2014)                             |
| KO1             | 414976                                        | 745223                                                     | 1039570                                                    | Gamba et al. (2014)                              |
| MA1             | 35313                                         | 99763                                                      | 504287                                                     | Raghavan et al. (2014)                           |
| Mota            | 102604                                        | 300381                                                     | 1699427                                                    | Gallego-Llorente2015                             |
| NE5             | 74916                                         | 203483                                                     | 858144                                                     | Gamba et al. (2014)                              |
| NE6             | 73159                                         | 198106                                                     | 974979                                                     | Gamba et al. (2014)                              |
| NE7             | 74626                                         | 202923                                                     | 949847                                                     | Gamba et al. (2014)                              |
| Satsurbliia     | 75549                                         | 221996                                                     | 1158984                                                    | Jones et al. (2015)                              |
| Motala1/I0011   | 347021                                        | 587972                                                     | 160770                                                     | Lazaridis et al. (2014), Mathieson et al. (2015) |
| Motala2/I0012   | 434301                                        | 731445                                                     | 234654                                                     | Lazaridis et al. (2014), Mathieson et al. (2015) |
| Motala3/I0013   | 258476                                        | 298714                                                     | *                                                          | Lazaridis et al. (2014), Mathieson et al. (2015) |
| Motala4/I0014   | 434714                                        | 698031                                                     | 188548                                                     | Lazaridis et al. (2014), Mathieson et al. (2015) |
| Motala6/I0015   | 370945                                        | 556799                                                     | 127750                                                     | Lazaridis et al. (2014), Mathieson et al. (2015) |
| Motala12/I0017  | 503322                                        | 857690                                                     | 1457992                                                    | Lazaridis et al. (2014), Mathieson et al. (2015) |
| UzOO74/I0061    | 536949                                        | 957887                                                     | 390487                                                     | Mathieson et al. (2015)                          |
| SVP44/I0124     | 282751                                        | 446671                                                     | 99887                                                      | Mathieson et al. (2015)                          |
| UzOO40/I0211    | 73963                                         | 135875                                                     | 25445                                                      | Mathieson et al. (2015)                          |
| BAR2/I0707      | 536086                                        | 941835                                                     | 442887                                                     | Mathieson et al. (2015)                          |
| BAR6/I0708      | 525535                                        | 913818                                                     | 389237                                                     | Mathieson et al. (2015)                          |
| BAR20/I0709     | 531783                                        | 920496                                                     | 436761                                                     | Mathieson et al. (2015)                          |
| L11-216/I0736   | 462639                                        | 755679                                                     | 218371                                                     | Mathieson et al. (2015)                          |
| M10-275/I0744   | 477950                                        | 822903                                                     | 260522                                                     | Mathieson et al. (2015)                          |
| M11-363/I0745   | 533156                                        | 927837                                                     | 464096                                                     | Mathieson et al. (2015)                          |
| L11-322/I0746   | 535594                                        | 935324                                                     | 446015                                                     | Mathieson et al. (2015)                          |
| BAR26/I1096     | 390684                                        | 705558                                                     | 147125                                                     | Mathieson et al. (2015)                          |
| BAR271/I1097    | 388345                                        | 702390                                                     | 145044                                                     | Mathieson et al. (2015)                          |
| BAR99/I1098     | 409836                                        | 740392                                                     | 159847                                                     | Mathieson et al. (2015)                          |
| M11-352a/I1101  | 339277                                        | 616629                                                     | 122322                                                     | Mathieson et al. (2015)                          |
| M11-S-350/I1103 | 309136                                        | 561561                                                     | 103912                                                     | Mathieson et al. (2015)                          |

|                     |        |         |         |                                       |
|---------------------|--------|---------|---------|---------------------------------------|
| M13-72/I1579        | 423543 | 772168  | 200584  | Mathieson et al. (2015)               |
| L12-393/I1580       | 471099 | 855638  | 311850  | Mathieson et al. (2015)               |
| L12-502/I1581       | 425080 | 774697  | 213779  | Mathieson et al. (2015)               |
| L14-200/I1583       | 505043 | 914076  | 389573  | Mathieson et al. (2015)               |
| M11-59/I1585        | 427645 | 778039  | 232951  | Mathieson et al. (2015)               |
| LBK1992/I0025       | 476557 | 827905  | 244202  | Mathieson et al. (2015)               |
| LBK2155/I0026       | 485096 | 850232  | 234029  | Mathieson et al. (2015)               |
| HAL5/I0046          | 464381 | 829856  | 351506  | Mathieson et al. (2015)               |
| UWS4/I0054          | 547797 | 960468  | 626530  | Mathieson et al. (2015)               |
| HAL4/I0100          | 531901 | 922902  | 410387  | Mathieson et al. (2015)               |
| CB13                | 63867  | 183119  | 970351  | Olalde et al. (2016)                  |
| Gok2                | 70093  | 187298  | 888578  | Skoglund et al. (2014)                |
| Hum1                | 36545  | 107443  | 562138  | this study                            |
| Hum2                | 97637  | 286491  | 1603656 | this study                            |
| SBJ                 | 30512  | 87942   | 574454  | this study                            |
| SF11                | 11886  | 33728   | 171620  | Skoglund et al. (2014) and this study |
| SF9                 | 51038  | 146258  | 731468  | this study                            |
| Steigen             | 76113  | 224241  | 1217162 | this study                            |
| Ajv58               | 96273  | 281130  | 1531643 | Skoglund et al. (2014) and this study |
| Ajv70               | 79856  | 228312  | 1171958 | Skoglund et al. (2014) and this study |
| Kotias              | 97602  | 289363  | 1521960 | Jones et al. (2015)                   |
| NE1                 | 97147  | 1095486 | 1562267 | Gamba et al. (2014)                   |
| LBK/Stuttgart       | 554264 | 290309  | 1611413 | Lazaridis et al. (2014)               |
| Loschbour           | 558885 | 1058564 | 1571764 | Lazaridis et al. (2014)               |
| Ust_Ishim           | 573301 | 1069826 | 1661490 | Fu et al. (2014)                      |
| SF12                | 576797 | 1101606 | 1749144 | this study                            |
| Zv313# (Latvia_HG1) | 67736  | 241991  | 1017742 | Jones et al. (2017)                   |
| Zv93# (Latvia_HG2)  | 98071  | 349433  | 1535533 | Jones et al. (2017)                   |
| Zv121# (Latvia_HG3) | 56402  | 200712  | 835147  | Jones et al. (2017)                   |

\*Motala3 was excluded from the analysis of the shotgun BAM files as the BAM file seems identical to Motala12.

#The individuals from Jones et al. (2017) were named based on the burial number at the site. The original names used by Jones et al. (2017) are given in parentheses.

## S6.2 Principal component analysis

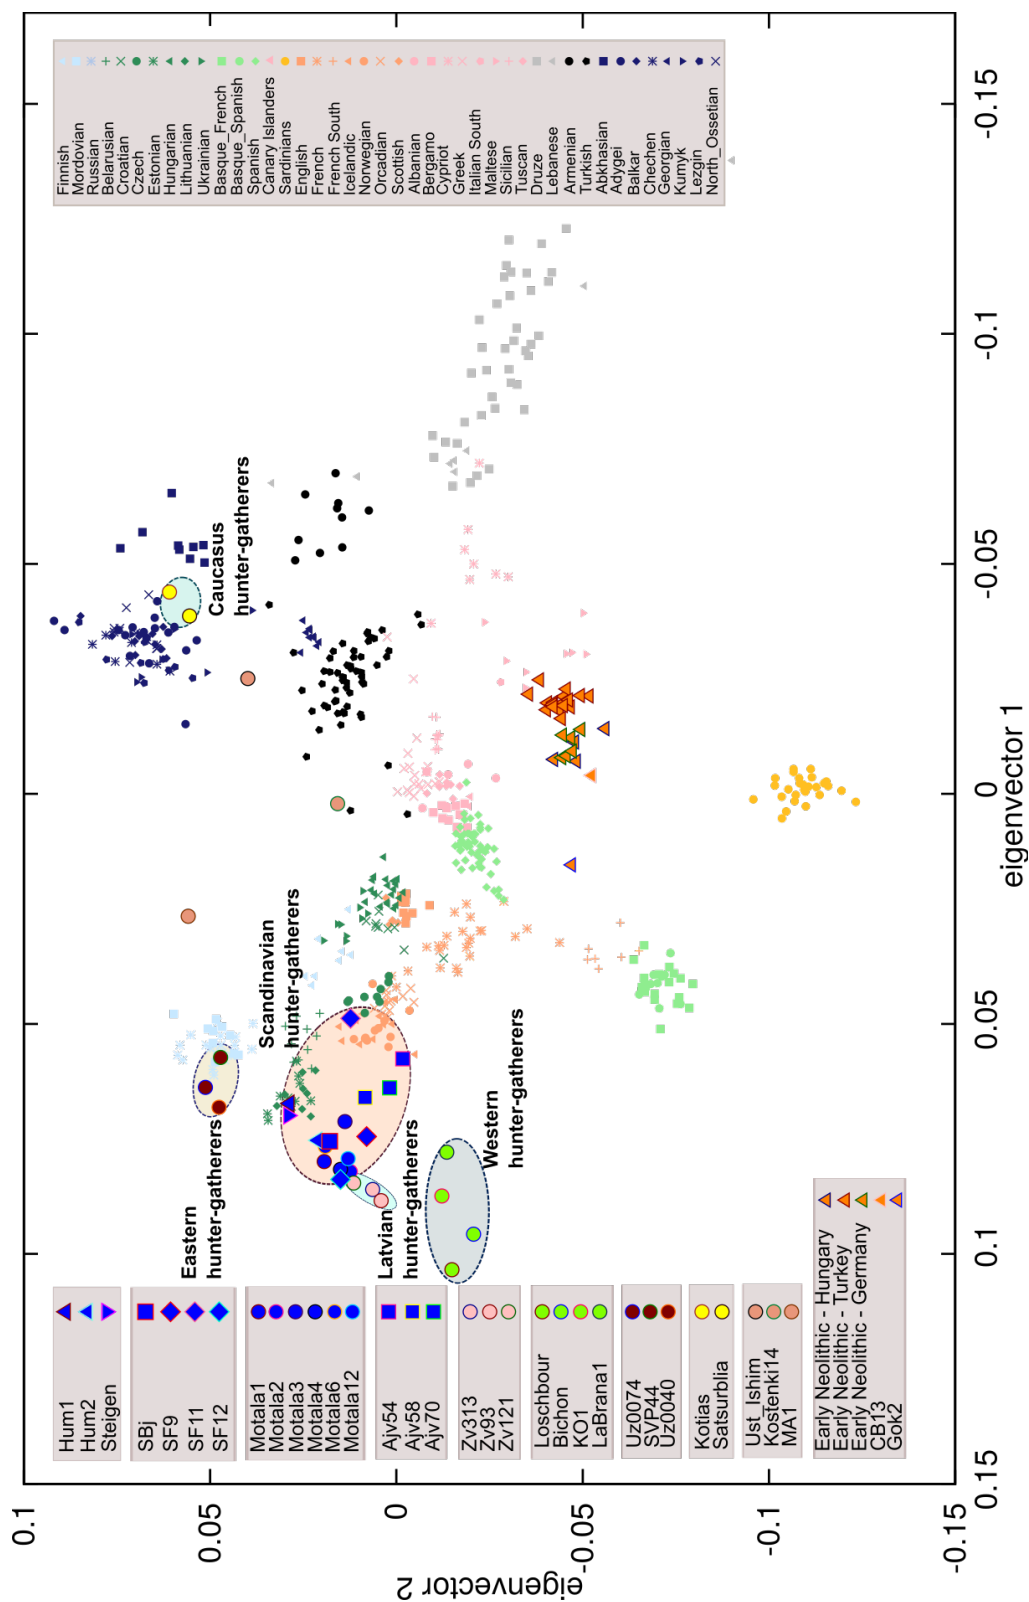

**Figure S6.1** PCA of ancient individuals used in this study projected on a PCA of modern-day western Eurasians.

All Mesolithic individuals cluster tightly with individuals from a similar geographic region and cultural context (Figure 1 and Figure S6.1). The only exception appears to be SF11, instead of clustering with other Mesolithic individuals from Gotland, it clusters with Neolithic Pitted Ware culture (PWC) samples (also from Gotland). This grouping is consistent with a previous publication involving these individuals [1]. SF11 is also the lowest coverage individual with the highest estimate of nuclear contamination (Table 1, Table S4.2). To further investigate the clustering of SF11, we used SF9 as a representative of Mesolithic Gotland and down-sampled it to 34000, 19000, 15000, 8000 and 4000 SNPs. Additionally we produced ten different subsamples of SF9 with 10000 SNPs each to represent the noise caused by this low number of SNPs. While this subsampling added noise to the position of SF9 in the PCA, it was not possible to reproduce the position of SF11 (Figure S6.2). To assess whether modern contamination could have caused the clustering of SF11, we restricted the analysis to damaged reads using PMDTools [2] and PMD score cutoffs of 2 and 3. This filtering step changed the position of SF11 in the PCA but did not lead to a clustering with other Mesolithic samples from Gotland (here represented by SF9). Finally, we also tried to combine contamination and low coverage by artificially adding 10 and 20% nuclear contamination from a randomly chosen GBR sample from the 1000 genomes data [3] to the subsampled (8000 SNPs) SF9 sample. Adding contamination to SF9 results in a position closer to SF11's location in the PCA, but even 20% contamination is not sufficient to reproduce the clustering of SF11. We note that contamination from a source other than modern North-Western Europeans might cause other patterns. This led us to the conclusion that the position of SF11 in the PCA might be a combination of noise due to lower coverage, modern contamination, and possibly a slightly different genetic makeup of SF11.

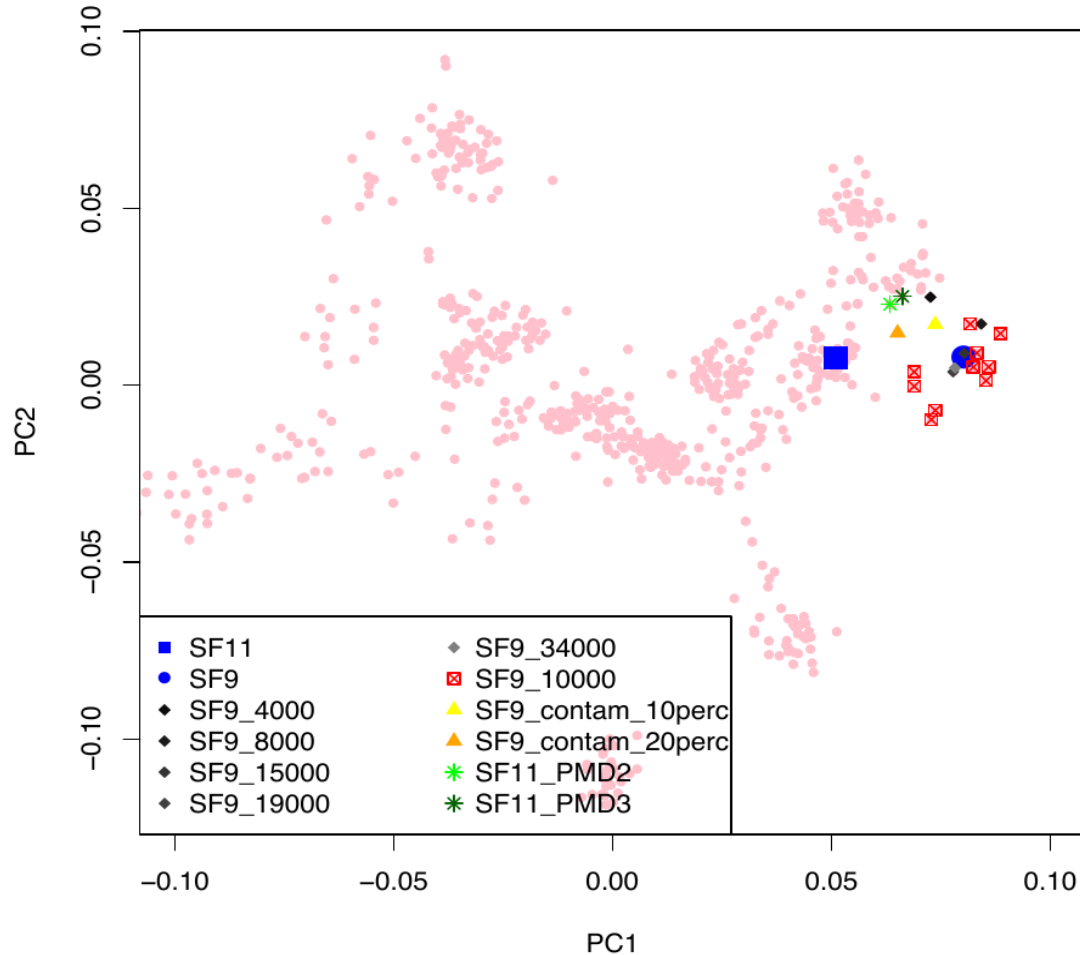

**Figure S6.2** PCA for SF11 as well as different subsets and simulated contamination of SF9.

### S6.3 Admixture graphs

Relationships amongst ancient individuals were examined using a statistical framework as implemented in TreeMix [4]. Treemix builds a maximum likelihood tree of populations using the covariance matrix of allele frequencies and fits admixture edges to given populations. TreeMix was applied to SF12, Motala12 [5] (as representatives of Scandinavian hunter-gatherers from Sweden), Hum1, Hum2 (as representatives of Scandinavian hunter-gatherers from Norway), Loschbour [5] (as representative of west European hunter-gatherers), and UzOO74 [6] (I0061, as representative of east European hunter-gatherers) and the tree was rooted with the ancient Ethiopian Mota individual [7]. The dataset was haploidized by selecting one random allele per each allele in each individual. Since single individuals were used separately, TreeMix was run with “-noss” option to turn off the correction for low sample size and standard errors were estimated using blocks of 500 SNPs with (-k 500 -se) parameters.

Analysis was restricted with a total of 73,960 overlapping transversion SNPs that were ascertained in African Yoruba individuals from the 1000 Genomes project [3] and were genotyped in seven ancient individuals. TreeMix was run by modelling “known” gene flow from east European hunter-gatherers

into all four Scandinavian hunter-gatherers using the (`-cor-mig` and `-climb`) parameters with 50 different random seeds. Starting proportion of admixture was set as 0.0 to allow 0% possibility of gene flow. The majority of runs (78%) supported the gene flow from EHG to all SHGs. Hum1 and Hum2 received more EHG ancestry with admixture proportions of 48% and 45%, respectively while SF12 and Motala12 received approximately 12% EHG ancestry ( $p < 0.05$ ). We report the graph with the highest likelihood and most common topology in Figure S6.3.

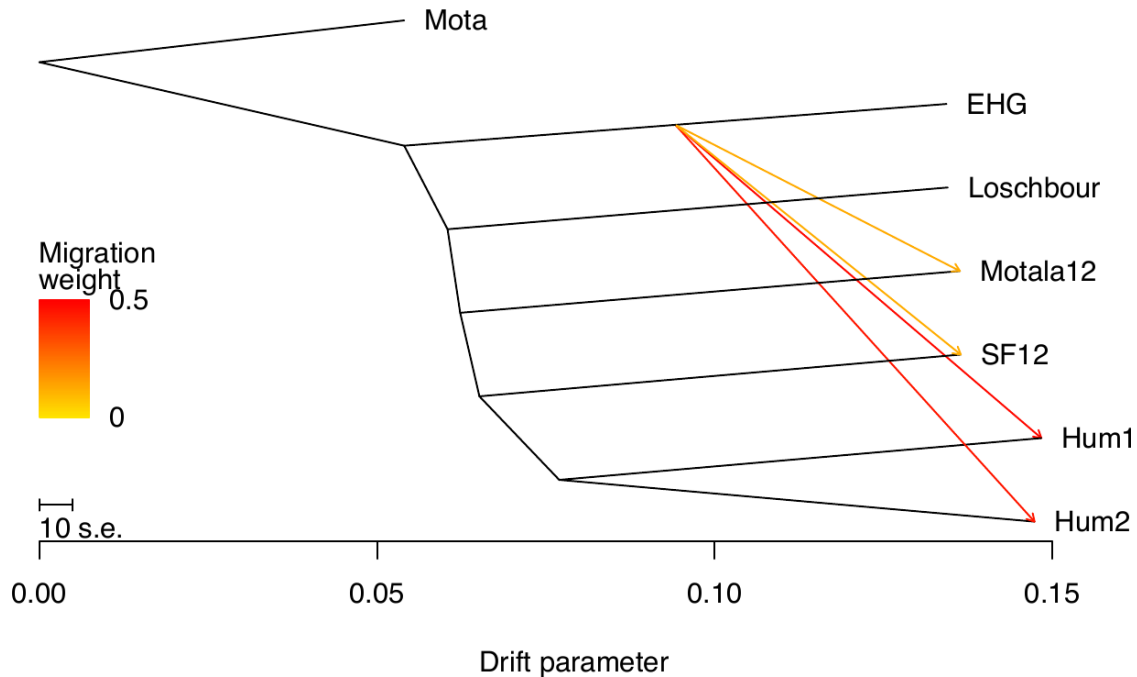

**Figure S6.3** Treemix model of the data including gene flow from EHG into all SHGs.

## References

1. Skoglund P, Malmstrom H, Omrak A, Raghavan M, Valdiosera C, Gunther T, et al. Genomic Diversity and Admixture Differs for Stone-Age Scandinavian Foragers and Farmers. *Science*. 2014;344: 747–750. doi:10.1126/science.1253448
2. Skoglund P, Northoff BH, Shunkov MV, Derevianko AP, Pääbo S, Krause J, et al. Separating endogenous ancient DNA from modern day contamination in a Siberian Neandertal. *Proceedings of the National Academy of Sciences*. 2014;111: 2229–2234.
3. Auton A, Abecasis GR, Altshuler DM, Durbin RM, Abecasis GR, Bentley DR, et al. A global reference for human genetic variation. *Nature*. 2015;526: 68–74. doi:10.1038/nature15393
4. Pickrell JK, Pritchard JK. Inference of population splits and mixtures from genome-wide allele frequency data. *PLoS Genet*. 2012;8: e1002967. doi:10.1371/journal.pgen.1002967
5. Lazaridis I, Patterson N, Mittnik A, Renaud G, Mallick S, Kirsanow K, et al. Ancient human genomes suggest three ancestral populations for present-day Europeans. *Nature*. 2014;513: 409–413. doi:10.1038/nature13673

6. Mathieson I, Lazaridis I, Rohland N, Mallick S, Patterson N, Roodenberg SA, et al. Genome-wide patterns of selection in 230 ancient Eurasians. *Nature*. 2015;528: 499–503. doi:10.1038/nature16152
7. Llorente MG, Jones ER, Eriksson A, Siska V, Arthur KW, Arthur JW, et al. Ancient Ethiopian genome reveals extensive Eurasian admixture throughout the African continent. *Science*. 2015;350: 820–2. doi:10.1126/science.aad2879
