# Supplementary material for: Population genomics of Mesolithic Scandinavia: Investigating early postglacial migration routes and high-latitude adaptation
Source: PLoS Biol. 2018 Jan 9;16(1):e2003703. doi: 10.1371/journal.pbio.2003703 (PMC5760011; doi:10.1371/journal.pbio.2003703)
Supplement: S1 Data — (XLSX) [file pbio.2003703.s015.xlsx]

## Sheet: Fig 1a
Admixture proportions inferred by qpAdm
Individual	EHG	WHG
sf12	0.369	0.631
Hum1	0.668	0.332
Hum2	0.432	0.568
Sbj	0.217	0.783
sf9	0.376	0.624
Steigen	0.541	0.459
Motala1	0.346	0.654
Motala2	0.383	0.617
Motala3	0.342	0.658
Motala4	0.44	0.56
Motala6	0.371	0.629
Motala12	0.373	0.627
Zv313	0.371	0.629
Zv93	0.314	0.686
Zv121	0.297	0.703

## Sheet: Fig 1b
Principal component analysis
	Individual	Group	PC1	PC2
	Hum1	Hum	0.0673	0.0286
	Hum2	Hum	0.0753	0.0211
	Steigen	Steigen	0.0699	0.0291
	SBj	SBj	0.0755	0.0179
	SF9	SF	0.0745	0.0080
	SF11	SF	0.0488	0.0123
	SF12	SF	0.0838	0.0150
	Motala1	Motala	0.0799	0.0194
	Motala2	Motala	0.0821	0.0124
	Motala3	Motala	0.0712	0.0138
	Motala4	Motala	0.0816	0.0150
	Motala6	Motala	0.0766	0.0191
	Motala12	Motala	0.0793	0.0130
	Bichon	WHG	0.0957	-0.0207
	LaBrana1	WHG	0.0779	-0.0135
	Loschbour	WHG	0.1034	-0.0184
	UzOO74	EHG	0.0638	0.0513
	SVP44	EHG	0.0573	0.0472
	UzOO40	EHG	0.0681	0.0476
	Zv313	Latvia_HG	0.0860	0.0064
	Zv93	Latvia_HG	0.0884	0.0041
	Zv121	Latvia_HG	0.0846	0.0115
Eigenvalues			2.405	1.795

## Sheet: Fig 1c
Results of f4(Chimp,X; EHG, WHG)
Individual	f4	SE	Z	Overlapping SNPs
sf12	0.0022639	0.000590051	3.83678	940534
H22	-0.00228432	0.000771517	-2.96082	91858
H26	-0.00156965	0.000542924	-2.8911	244694
sbj001	0.00106016	0.000806367	1.31474	76246
sf11	0.00388603	0.00112265	3.46147	29293
sf9	0.00254421	0.000626202	4.06292	126644
stg001	-0.00208029	0.000559799	-3.71613	191500
Motala1	0.0022327	0.000595362	3.75016	547095
Motala2	0.00336444	0.000601209	5.59613	676796
Motala3	0.00292839	0.000635033	4.61139	287445
Motala4	0.00315338	0.000589594	5.34838	652568
Motala6	0.00228075	0.000594903	3.83382	525850
Motala12	0.00250723	0.000588798	4.25821	785995
Zv313	0.00325526	0.000502515	6.47794	206934
Zv93	0.00439163	0.000417626	10.5157	298342
Zv121	0.00415576	0.000522105	7.95962	171860

## Sheet: Fig 3a
Runs of Homozygosity
IND	POP	NUM segments	SUM segments
NA18486	Yoruba	66	47.7721
NA18488	Yoruba	74	51.1646
NA18489	Yoruba	75	55.039
NA18498	Yoruba	71	54.6041
NA18499	Yoruba	63	45.3312
NA18501	Yoruba	72	66.3049
NA18502	Yoruba	102	79.9653
NA18504	Yoruba	103	73.6288
NA18505	Yoruba	65	45.6156
NA18507	Yoruba	78	58.0268
NA18508	Yoruba	67	47.8917
NA18510	Yoruba	86	59.9691
NA18511	Yoruba	68	50.0246
NA18516	Yoruba	74	55.7706
NA18517	Yoruba	70	49.3557
NA18519	Yoruba	72	54.8357
NA18520	Yoruba	77	51.4425
NA18522	Yoruba	59	40.9479
NA18523	Yoruba	57	48.4821
NA18853	Yoruba	73	46.4631
NA18856	Yoruba	50	35.7144
NA18858	Yoruba	79	66.575
NA18861	Yoruba	89	64.8823
NA18864	Yoruba	100	72.9045
NA18865	Yoruba	73	50.3058
NA18867	Yoruba	101	72.7767
NA18868	Yoruba	54	38.505
NA18870	Yoruba	86	70.4447
NA18871	Yoruba	46	41.6484
NA18873	Yoruba	79	49.4025
NA18874	Yoruba	65	51.0492
NA18876	Yoruba	84	62.2489
NA18877	Yoruba	72	58.1258
NA18878	Yoruba	95	72.0805
NA18879	Yoruba	70	53.5274
NA18881	Yoruba	76	58.0257
NA18907	Yoruba	88	71.3333
NA18908	Yoruba	63	42.3126
NA18909	Yoruba	51	39.2359
NA18910	Yoruba	104	77.8745
NA18912	Yoruba	73	46.3819
NA18915	Yoruba	97	64.6673
NA18916	Yoruba	66	48.7027
NA18917	Yoruba	66	45.3472
NA18923	Yoruba	111	83.3244
NA18924	Yoruba	86	58.563
NA18933	Yoruba	109	84.8159
NA18934	Yoruba	85	63.872
NA19092	Yoruba	83	67.0239
NA19093	Yoruba	73	63.1655
NA19095	Yoruba	99	82.0712
NA19096	Yoruba	92	81.7393
NA19098	Yoruba	82	62.796
NA19099	Yoruba	66	52.7473
NA19102	Yoruba	71	56.4498
NA19107	Yoruba	104	84.5832
NA19108	Yoruba	80	60.7082
NA19113	Yoruba	124	119.404
NA19114	Yoruba	88	66.578
NA19116	Yoruba	66	46.535
NA19117	Yoruba	68	48.6371
NA19118	Yoruba	62	47.5249
NA19119	Yoruba	74	55.2654
NA19121	Yoruba	64	49.8429
NA19129	Yoruba	80	59.5942
NA19130	Yoruba	62	41.707
NA19131	Yoruba	66	44.1475
NA19137	Yoruba	80	57.3833
NA19138	Yoruba	97	82.4221
NA19141	Yoruba	120	102.469
NA19143	Yoruba	69	51.732
NA19144	Yoruba	72	51.6952
NA19146	Yoruba	82	59.9898
NA19147	Yoruba	86	68.8576
NA19149	Yoruba	98	78.6837
NA19152	Yoruba	76	53.8611
NA19153	Yoruba	111	90.3864
NA19159	Yoruba	68	47.0463
NA19160	Yoruba	79	59.7529
NA19171	Yoruba	73	63.1173
NA19172	Yoruba	83	80.3924
NA19175	Yoruba	99	71.2616
NA19184	Yoruba	84	64.137
NA19185	Yoruba	85	61.6243
NA19189	Yoruba	118	139.892
NA19190	Yoruba	78	60.9642
NA19197	Yoruba	78	62.3253
NA19198	Yoruba	96	74.1758
NA19200	Yoruba	87	63.4756
NA19201	Yoruba	114	118.132
NA19204	Yoruba	73	53.501
NA19206	Yoruba	84	61.697
NA19207	Yoruba	79	60.5736
NA19209	Yoruba	90	63.0782
NA19210	Yoruba	46	34.149
NA19213	Yoruba	62	41.8565
NA19214	Yoruba	71	56.6246
NA19222	Yoruba	107	81.3898
NA19223	Yoruba	95	69.1859
NA19225	Yoruba	71	49.7582
NA19235	Yoruba	96	73.4656
NA19236	Yoruba	97	70.6579
NA19238	Yoruba	93	64.9518
NA19239	Yoruba	79	55.6613
NA19247	Yoruba	84	64.0161
NA19248	Yoruba	70	47.8574
NA19256	Yoruba	93	65.0217
NA19257	Yoruba	68	45.4085
Bichon	Bichon	174	2630.46
LaBrana1	LaBrana1	960	1691.66
Mota	Mota	186	2624.08
Satsurblia	CHG	3	1.6774
Motala12	Motala12	1334	2223.45
Gok2	TRB	5	3.77812
H26	H26	284	2586.96
stg001	stg001	27	16.1453
ajv58	PWC	593	2521.22
ajv70	PWC	89	58.6672
Kotias	CHG	375	331.647
LBK	EN_Germany	236	190.499
Loschbour	Loschbour	552	520.573
NE1	EN_Hungary	241	185.156
Ust_Ishim	Ust_Ishim	354	382.824
SF12	SF12	395	352.457
HG00096	GBR	161	123.906
HG00097	GBR	180	131.143
HG00099	GBR	195	148.864
HG00100	GBR	183	134.636
HG00101	GBR	189	149.55
HG00102	GBR	188	148.2
HG00103	GBR	178	147.806
HG00105	GBR	190	144.272
HG00106	GBR	166	122.278
HG00107	GBR	209	164.417
HG00108	GBR	192	147.724
HG00109	GBR	204	146.627
HG00110	GBR	202	199.08
HG00111	GBR	214	178.309
HG00112	GBR	211	176.814
HG00113	GBR	161	124.049
HG00114	GBR	215	182.055
HG00115	GBR	181	136.581
HG00116	GBR	190	142.898
HG00117	GBR	217	210.45
HG00118	GBR	176	129.811
HG00119	GBR	198	141.995
HG00120	GBR	202	150.992
HG00121	GBR	233	185.101
HG00122	GBR	176	128.224
HG00123	GBR	164	119.899
HG00125	GBR	195	149.937
HG00126	GBR	188	141.97
HG00127	GBR	190	156.316
HG00128	GBR	196	143.969
HG00129	GBR	215	160.224
HG00130	GBR	175	130.964
HG00131	GBR	197	147.382
HG00132	GBR	185	139.15
HG00133	GBR	173	127.296
HG00136	GBR	199	148.475
HG00137	GBR	179	135.52
HG00138	GBR	178	133.078
HG00139	GBR	180	133.464
HG00140	GBR	178	129.002
HG00141	GBR	177	126.169
HG00142	GBR	176	129.69
HG00143	GBR	182	138.317
HG00145	GBR	187	135.742
HG00146	GBR	187	136.132
HG00148	GBR	180	129.811
HG00149	GBR	197	145.453
HG00150	GBR	192	146.341
HG00151	GBR	187	132.49
HG00154	GBR	196	149.878
HG00155	GBR	184	134.509
HG00157	GBR	190	138.273
HG00158	GBR	181	131.186
HG00159	GBR	177	129.532
HG00160	GBR	190	138.122
HG00171	FIN	206	164.981
HG00173	FIN	209	151.166
HG00174	FIN	183	132.054
HG00176	FIN	190	143.996
HG00177	FIN	232	190.522
HG00178	FIN	186	138.53
HG00179	FIN	197	143.816
HG00180	FIN	199	162.308
HG00181	FIN	169	121.636
HG00182	FIN	205	155.446
HG00183	FIN	223	172.849
HG00185	FIN	187	150.004
HG00186	FIN	232	186.843
HG00187	FIN	212	171.303
HG00188	FIN	196	146.097
HG00189	FIN	208	154.082
HG00190	FIN	210	158.187
HG00231	GBR	211	159.371
HG00232	GBR	189	139.643
HG00233	GBR	204	149.002
HG00234	GBR	205	153.332
HG00235	GBR	209	155.871
HG00236	GBR	183	191.615
HG00237	GBR	177	133.009
HG00238	GBR	189	147.234
HG00239	GBR	202	152.034
HG00240	GBR	203	143.391
HG00242	GBR	179	129.593
HG00243	GBR	163	120.32
HG00244	GBR	157	118.681
HG00245	GBR	194	149.119
HG00246	GBR	174	125.271
HG00250	GBR	174	126.008
HG00251	GBR	175	121.265
HG00252	GBR	193	142.777
HG00253	GBR	174	129.617
HG00254	GBR	179	137.261
HG00255	GBR	211	157.607
HG00256	GBR	197	141.274
HG00257	GBR	223	162.648
HG00258	GBR	198	138.403
HG00259	GBR	167	118.275
HG00260	GBR	194	142.008
HG00261	GBR	209	152.943
HG00262	GBR	203	148.05
HG00263	GBR	193	140.308
HG00264	GBR	171	126.202
HG00265	GBR	205	147.835
HG00266	FIN	195	156.12
HG00267	FIN	219	171.37
HG00268	FIN	198	147.059
HG00269	FIN	218	170.787
HG00271	FIN	209	167.166
HG00272	FIN	209	173.652
HG00273	FIN	196	147.037
HG00274	FIN	200	168.739
HG00275	FIN	216	162.4
HG00276	FIN	203	163.43
HG00277	FIN	205	153.09
HG00278	FIN	213	163.096
HG00280	FIN	208	161.933
HG00281	FIN	194	146.464
HG00282	FIN	194	141.113
HG00284	FIN	210	159.274
HG00285	FIN	234	192.565
HG00288	FIN	205	156.754
HG00290	FIN	204	164.122
HG00304	FIN	200	160.199
HG00306	FIN	205	151.376
HG00308	FIN	210	165.42
HG00309	FIN	211	159.062
HG00310	FIN	213	166.576
HG00311	FIN	219	168.701
HG00313	FIN	197	159.255
HG00315	FIN	180	140.09
HG00318	FIN	185	134.808
HG00319	FIN	191	147.199
HG00320	FIN	227	176.295
HG00321	FIN	226	171.982
HG00323	FIN	221	186.048
HG00324	FIN	246	224.574
HG00325	FIN	207	165.762
HG00326	FIN	206	159.443
HG00327	FIN	215	164.927
HG00328	FIN	206	157.941
HG00329	FIN	186	151.98
HG00330	FIN	192	146.976
HG00331	FIN	181	136.897
HG00332	FIN	188	141.308
HG00334	FIN	217	154.107
HG00335	FIN	170	131.733
HG00336	FIN	211	155.848
HG00337	FIN	184	138.014
HG00338	FIN	205	155.052
HG00339	FIN	216	169.315
HG00341	FIN	209	164.453
HG00342	FIN	200	158.021
HG00343	FIN	213	162.222
HG00344	FIN	198	144.044
HG00345	FIN	214	150.008
HG00346	FIN	200	163.358
HG00349	FIN	189	145.97
HG00350	FIN	222	162.462
HG00351	FIN	196	156.695
HG00353	FIN	181	137.461
HG00355	FIN	198	153.545
HG00356	FIN	185	146.268
HG00357	FIN	222	180.231
HG00358	FIN	201	167.917
HG00360	FIN	205	151.401
HG00361	FIN	206	165.156
HG00362	FIN	199	152.183
HG00364	FIN	198	157.025
HG00365	FIN	186	144.654
HG00366	FIN	204	161.836
HG00367	FIN	203	152.338
HG00368	FIN	218	176.277
HG00369	FIN	202	154.975
HG00371	FIN	201	154.609
HG00372	FIN	214	158.991
HG00373	FIN	233	189.038
HG00375	FIN	204	170.918
HG00376	FIN	208	166.64
HG00378	FIN	189	140.033
HG00379	FIN	217	164.791
HG00380	FIN	212	155.519
HG00381	FIN	183	134.577
HG00382	FIN	190	155.699
HG00383	FIN	224	179.764
HG00384	FIN	213	167.45
HG00403	CHS	228	164.672
HG00404	CHS	237	169.518
HG00406	CHS	229	177.908
HG00407	CHS	221	158.882
HG00409	CHS	226	165.304
HG00410	CHS	189	133.76
HG00419	CHS	203	146.09
HG00421	CHS	236	172.357
HG00422	CHS	211	154.552
HG00428	CHS	229	168.171
HG00436	CHS	240	175.542
HG00437	CHS	235	161.716
HG00442	CHS	216	163.76
HG00443	CHS	216	158.476
HG00445	CHS	209	151.708
HG00446	CHS	204	149.807
HG00448	CHS	216	159.273
HG00449	CHS	223	167.146
HG00451	CHS	228	164.888
HG00452	CHS	231	169.682
HG00457	CHS	225	168.225
HG00458	CHS	226	159.111
HG00463	CHS	235	169.288
HG00464	CHS	238	168.641
HG00472	CHS	206	151.234
HG00473	CHS	227	188.888
HG00475	CHS	224	155.108
HG00476	CHS	229	165.298
HG00478	CHS	229	168.158
HG00479	CHS	221	160.611
HG00500	CHS	219	161.97
HG00513	CHS	209	155.19
HG00524	CHS	230	176.158
HG00525	CHS	231	194.888
HG00530	CHS	238	176.607
HG00531	CHS	247	177.817
HG00533	CHS	238	172.507
HG00534	CHS	234	172.834
HG00536	CHS	216	159.552
HG00537	CHS	219	156.913
HG00542	CHS	242	174.694
HG00543	CHS	224	156.538
HG00556	CHS	220	155.754
HG00557	CHS	221	163.329
HG00559	CHS	230	170.473
HG00560	CHS	233	167.923
HG00565	CHS	237	175.205
HG00566	CHS	255	189.399
HG00580	CHS	216	162.2
HG00581	CHS	220	159.923
HG00583	CHS	201	146.902
HG00584	CHS	219	156.89
HG00589	CHS	238	173.822
HG00590	CHS	221	164.245
HG00592	CHS	243	174.466
HG00593	CHS	231	171.68
HG00595	CHS	243	177.792
HG00596	CHS	243	181.407
HG00598	CHS	232	172.624
HG00599	CHS	215	160.819
HG00607	CHS	224	158.24
HG00608	CHS	226	170.516
HG00610	CHS	234	173.561
HG00611	CHS	227	163.968
HG00613	CHS	204	154.401
HG00614	CHS	224	163.488
HG00619	CHS	253	196.805
HG00620	CHS	235	172.975
HG00622	CHS	201	148.89
HG00623	CHS	226	171.779
HG00625	CHS	236	172.179
HG00626	CHS	235	165.316
HG00628	CHS	239	166.165
HG00629	CHS	227	164.664
HG00631	CHS	205	147.144
HG00632	CHS	213	152.736
HG00634	CHS	252	175.966
HG00650	CHS	246	183.933
HG00651	CHS	228	167.028
HG00653	CHS	224	160.587
HG00654	CHS	223	162.951
HG00656	CHS	234	165.777
HG00657	CHS	233	169.883
HG00662	CHS	241	176.951
HG00663	CHS	225	163.079
HG00671	CHS	233	171.749
HG00672	CHS	215	163.135
HG00674	CHS	227	162.854
HG00675	CHS	220	152.188
HG00683	CHS	226	177.76
HG00684	CHS	209	154.59
HG00689	CHS	217	156.382
HG00690	CHS	246	176.392
HG00692	CHS	225	165.72
HG00693	CHS	225	165.459
HG00698	CHS	231	168.662
HG00699	CHS	216	157.115
HG00701	CHS	216	157.242
HG00704	CHS	223	163.239
HG00705	CHS	233	165.045
HG00707	CHS	247	182.869
HG00708	CHS	217	165.423
HG00717	CHS	234	169.709
HG00728	CHS	200	144.425
HG00729	CHS	238	171.369
HG00759	CDX	244	178.162
HG00766	CDX	214	157.664
HG00844	CDX	199	148.198
HG00851	CDX	249	193.112
HG00864	CDX	224	168.54
HG00867	CDX	206	152.265
HG00879	CDX	221	158.16
HG00881	CDX	205	147.641
HG00956	CDX	212	158.342
HG00978	CDX	211	157.211
HG00982	CDX	230	167.307
HG01028	CDX	212	155.04
HG01029	CDX	238	167.7
HG01031	CDX	228	167.859
HG01046	CDX	228	187.63
HG01334	GBR	193	136.789
HG01500	IBS	167	120.28
HG01501	IBS	177	134.046
HG01503	IBS	200	150.466
HG01504	IBS	198	151.603
HG01506	IBS	189	144.3
HG01507	IBS	173	128.749
HG01509	IBS	175	124.694
HG01510	IBS	157	114.274
HG01512	IBS	185	134.061
HG01513	IBS	196	143.99
HG01515	IBS	212	158.469
HG01516	IBS	201	155.973
HG01518	IBS	212	161.487
HG01519	IBS	212	159.464
HG01521	IBS	189	147.426
HG01522	IBS	218	173.555
HG01524	IBS	186	128.91
HG01525	IBS	170	120.798
HG01527	IBS	162	122.252
HG01528	IBS	186	144.911
HG01530	IBS	191	135.638
HG01531	IBS	207	188.126
HG01536	IBS	161	118.367
HG01537	IBS	185	131.19
HG01583	PJL	178	126.429
HG01586	PJL	169	119.473
HG01589	PJL	214	207.539
HG01593	PJL	219	218.739
HG01595	KHV	213	162.733
HG01596	KHV	236	173.869
HG01597	KHV	208	147.017
HG01598	KHV	208	151.744
HG01599	KHV	219	167.896
HG01600	KHV	215	151.53
HG01602	IBS	191	165.171
HG01603	IBS	177	128.072
HG01605	IBS	215	157.442
HG01606	IBS	184	134.386
HG01607	IBS	180	135.777
HG01608	IBS	178	125.136
HG01610	IBS	191	174.881
HG01612	IBS	178	135.547
HG01613	IBS	197	151.37
HG01615	IBS	185	168.651
HG01617	IBS	187	139.681
HG01618	IBS	194	138.745
HG01619	IBS	171	124.27
HG01620	IBS	182	135.477
HG01623	IBS	176	129.117
HG01624	IBS	155	110.221
HG01625	IBS	189	135.765
HG01626	IBS	189	135.143
HG01628	IBS	204	176.36
HG01630	IBS	185	134.423
HG01631	IBS	201	144.856
HG01632	IBS	174	131.718
HG01668	IBS	169	124.777
HG01669	IBS	191	140.594
HG01670	IBS	187	151.031
HG01672	IBS	204	159.677
HG01673	IBS	196	145.039
HG01675	IBS	183	134.956
HG01676	IBS	190	141.982
HG01678	IBS	196	142.418
HG01679	IBS	214	228.1
HG01680	IBS	204	176.618
HG01682	IBS	202	145.157
HG01684	IBS	170	123.262
HG01685	IBS	165	118.178
HG01686	IBS	187	140.431
HG01694	IBS	198	192.455
HG01695	IBS	175	144.527
HG01697	IBS	179	141.129
HG01699	IBS	185	138.589
HG01700	IBS	227	180.722
HG01702	IBS	206	154.443
HG01704	IBS	156	114.452
HG01705	IBS	165	118.679
HG01707	IBS	165	125.856
HG01708	IBS	154	106.383
HG01709	IBS	176	126.801
HG01710	IBS	160	116.494
HG01746	IBS	185	134.01
HG01747	IBS	191	141.889
HG01756	IBS	182	129.296
HG01757	IBS	190	136.223
HG01761	IBS	170	122.792
HG01762	IBS	189	163.221
HG01765	IBS	184	141.117
HG01766	IBS	179	143.96
HG01767	IBS	176	128.149
HG01768	IBS	180	132.77
HG01770	IBS	196	139.023
HG01771	IBS	173	122.711
HG01773	IBS	185	134.043
HG01775	IBS	196	145.68
HG01776	IBS	196	144.335
HG01777	IBS	168	121.851
HG01779	IBS	178	135.163
HG01781	IBS	178	135.53
HG01783	IBS	200	149.772
HG01784	IBS	201	157.234
HG01785	IBS	200	152.485
HG01786	IBS	206	151.062
HG01789	GBR	228	168.511
HG01790	GBR	190	137.552
HG01791	GBR	207	147.322
HG01794	CDX	246	188.31
HG01795	CDX	210	152.803
HG01796	CDX	227	167.012
HG01797	CDX	225	170.878
HG01798	CDX	218	161.705
HG01799	CDX	254	183.195
HG01800	CDX	256	228.578
HG01801	CDX	227	172.672
HG01802	CDX	213	153.981
HG01804	CDX	206	151.044
HG01805	CDX	226	165.067
HG01806	CDX	243	174.819
HG01807	CDX	199	146.086
HG01808	CDX	232	171.554
HG01809	CDX	232	189.435
HG01810	CDX	227	198.973
HG01811	CDX	234	188.331
HG01812	CDX	225	189.695
HG01813	CDX	223	168.103
HG01815	CDX	215	162.086
HG01816	CDX	344	451.81
HG01817	CDX	222	170.003
HG01840	KHV	214	158.115
HG01841	KHV	221	168.873
HG01842	KHV	200	146.289
HG01843	KHV	210	153.642
HG01844	KHV	214	153.635
HG01845	KHV	219	156.634
HG01846	KHV	204	148.264
HG01847	KHV	214	158.1
HG01848	KHV	224	169.961
HG01849	KHV	211	155.07
HG01850	KHV	206	148.445
HG01851	KHV	205	153.557
HG01852	KHV	205	148.613
HG01853	KHV	211	150.903
HG01855	KHV	219	156.392
HG01857	KHV	207	151.705
HG01858	KHV	245	175.405
HG01859	KHV	200	156.286
HG01860	KHV	228	167.924
HG01861	KHV	223	161.924
HG01862	KHV	218	156.948
HG01863	KHV	226	170.197
HG01864	KHV	230	166.929
HG01865	KHV	211	157.556
HG01866	KHV	213	161.158
HG01867	KHV	205	156.871
HG01868	KHV	230	173.576
HG01869	KHV	227	163.104
HG01870	KHV	223	181.595
HG01871	KHV	199	143.056
HG01872	KHV	212	151.144
HG01873	KHV	207	165.111
HG01874	KHV	207	151.948
HG01878	KHV	196	143.648
HG02016	KHV	228	165.026
HG02017	KHV	224	166.281
HG02019	KHV	239	175.713
HG02020	KHV	232	165.168
HG02023	KHV	204	145.379
HG02025	KHV	216	163.171
HG02026	KHV	228	161.172
HG02028	KHV	227	173.371
HG02029	KHV	230	165.602
HG02031	KHV	234	174.194
HG02032	KHV	226	166.065
HG02035	KHV	228	173.75
HG02040	KHV	218	153.353
HG02047	KHV	227	162.906
HG02048	KHV	212	154.204
HG02049	KHV	196	139.223
HG02050	KHV	206	147.922
HG02057	KHV	196	143.699
HG02058	KHV	185	141.907
HG02060	KHV	211	156.934
HG02061	KHV	233	170.047
HG02064	KHV	226	159.367
HG02067	KHV	211	151.664
HG02069	KHV	204	145.251
HG02070	KHV	218	159.8
HG02072	KHV	187	130.839
HG02073	KHV	200	146.599
HG02075	KHV	205	147.352
HG02076	KHV	188	139.821
HG02078	KHV	207	170.616
HG02079	KHV	200	149.753
HG02081	KHV	229	167.288
HG02082	KHV	241	170.645
HG02084	KHV	231	173.188
HG02085	KHV	206	155.892
HG02086	KHV	220	159.245
HG02087	KHV	229	171.542
HG02088	KHV	228	174.007
HG02113	KHV	246	188.568
HG02116	KHV	202	151.273
HG02121	KHV	213	155.35
HG02122	KHV	196	142.864
HG02127	KHV	243	197.768
HG02128	KHV	212	157.425
HG02130	KHV	229	162.586
HG02131	KHV	191	140.541
HG02133	KHV	210	154.725
HG02134	KHV	215	153.871
HG02136	KHV	230	166.078
HG02137	KHV	228	168.974
HG02138	KHV	237	173.377
HG02139	KHV	237	177.138
HG02140	KHV	211	156.339
HG02141	KHV	231	173.675
HG02142	KHV	205	148.651
HG02151	CDX	236	172.873
HG02152	CDX	240	195.013
HG02153	CDX	237	180.412
HG02154	CDX	261	252.862
HG02155	CDX	238	171.971
HG02156	CDX	252	209.654
HG02164	CDX	242	191.903
HG02165	CDX	227	168.027
HG02166	CDX	234	185.676
HG02178	CDX	242	197.249
HG02179	CDX	220	164.347
HG02180	CDX	238	178.858
HG02181	CDX	226	162.861
HG02182	CDX	222	165.16
HG02184	CDX	250	191.828
HG02185	CDX	239	199.663
HG02186	CDX	232	171.391
HG02187	CDX	223	162.422
HG02188	CDX	250	185.792
HG02190	CDX	238	174.257
HG02215	GBR	216	162.184
HG02219	IBS	175	128.704
HG02220	IBS	183	127.998
HG02221	IBS	200	152.844
HG02223	IBS	175	129.117
HG02224	IBS	187	142.445
HG02230	IBS	193	140.867
HG02231	IBS	169	119.579
HG02232	IBS	189	141.633
HG02233	IBS	167	119.852
HG02235	IBS	172	127.305
HG02236	IBS	195	143.575
HG02238	IBS	190	136.98
HG02239	IBS	150	115.277
HG02250	CDX	227	167.934
HG02351	CDX	204	149.492
HG02353	CDX	181	128.415
HG02355	CDX	221	168.202
HG02356	CDX	214	156.915
HG02360	CDX	229	174.976
HG02364	CDX	242	180.108
HG02367	CDX	250	184.725
HG02371	CDX	226	166.325
HG02373	CDX	205	150.566
HG02374	CDX	214	156.609
HG02375	CDX	214	161.48
HG02379	CDX	221	162.127
HG02380	CDX	291	303.585
HG02382	CDX	220	163.32
HG02383	CDX	221	170.802
HG02384	CDX	225	165.265
HG02385	CDX	251	191.127
HG02386	CDX	218	155.826
HG02389	CDX	255	186.467
HG02390	CDX	198	147.408
HG02391	CDX	244	192.265
HG02392	CDX	253	223.839
HG02394	CDX	233	186.893
HG02395	CDX	242	181.236
HG02396	CDX	240	176.196
HG02397	CDX	260	202.887
HG02398	CDX	235	175.341
HG02399	CDX	220	160.049
HG02401	CDX	204	158.906
HG02402	CDX	222	163.55
HG02406	CDX	241	174.118
HG02407	CDX	210	147.775
HG02408	CDX	246	189.88
HG02409	CDX	238	172.143
HG02410	CDX	218	168.675
HG02490	PJL	207	217.104
HG02491	PJL	125	88.4283
HG02493	PJL	154	123.371
HG02494	PJL	163	118.716
HG02512	KHV	229	210.645
HG02513	KHV	224	167.437
HG02521	KHV	211	151.58
HG02522	KHV	216	159.5
HG02597	PJL	175	140.788
HG02600	PJL	144	105.277
HG02601	PJL	152	111.732
HG02603	PJL	172	142.4
HG02604	PJL	264	383.581
HG02648	PJL	200	228.163
HG02649	PJL	240	284.695
HG02651	PJL	136	102.847
HG02652	PJL	147	108.846
HG02654	PJL	142	116.365
HG02655	PJL	261	303.787
HG02657	PJL	141	106.151
HG02658	PJL	331	464.366
HG02660	PJL	175	167.186
HG02661	PJL	174	130.083
HG02681	PJL	159	119.051
HG02682	PJL	167	135.252
HG02684	PJL	334	459.692
HG02685	PJL	214	245.897
HG02687	PJL	171	138.084
HG02688	PJL	151	121.858
HG02690	PJL	258	324.084
HG02691	PJL	176	156.453
HG02694	PJL	241	308.96
HG02696	PJL	134	97.2334
HG02697	PJL	178	131.189
HG02699	PJL	248	284.105
HG02700	PJL	168	122.556
HG02724	PJL	184	135.531
HG02725	PJL	173	138.601
HG02727	PJL	188	149.74
HG02728	PJL	176	126.382
HG02731	PJL	128	95.9999
HG02733	PJL	158	124.093
HG02734	PJL	305	434.29
HG02736	PJL	171	127.774
HG02737	PJL	138	105.531
HG02774	PJL	131	95.0406
HG02775	PJL	165	127.092
HG02778	PJL	171	155.954
HG02780	PJL	251	318.945
HG02783	PJL	173	154.725
HG02784	PJL	177	150.895
HG02786	PJL	170	141.65
HG02787	PJL	163	141.163
HG02789	PJL	179	130.701
HG02790	PJL	173	133.808
HG02792	PJL	170	130.427
HG02793	PJL	178	141.655
HG03006	BEB	136	98.2343
HG03007	BEB	161	138.298
HG03009	BEB	135	93.3534
HG03012	BEB	143	101.916
HG03015	PJL	188	151.573
HG03016	PJL	159	125.848
HG03018	PJL	178	142.694
HG03019	PJL	199	186.359
HG03021	PJL	171	133.988
HG03022	PJL	247	350.723
HG03228	PJL	195	183.754
HG03229	PJL	202	236.241
HG03234	PJL	157	122.032
HG03235	PJL	148	108.968
HG03237	PJL	182	162.233
HG03238	PJL	142	104.999
HG03488	PJL	127	87.7296
HG03490	PJL	217	261.605
HG03491	PJL	169	123.65
HG03585	BEB	142	105.473
HG03589	BEB	156	119.12
HG03593	BEB	153	114.025
HG03594	BEB	152	109.102
HG03595	BEB	147	105.42
HG03598	BEB	157	106.204
HG03600	BEB	166	116.937
HG03603	BEB	141	98.0598
HG03604	BEB	179	132.871
HG03607	BEB	139	98.8048
HG03611	BEB	137	98.5295
HG03615	BEB	214	204.98
HG03616	BEB	133	90.9719
HG03619	PJL	198	203.272
HG03624	PJL	160	118.667
HG03625	PJL	280	378.878
HG03629	PJL	148	107.959
HG03631	PJL	164	118.837
HG03634	PJL	155	112.477
HG03636	PJL	159	117.903
HG03640	PJL	182	158.992
HG03642	STU	137	98.2268
HG03643	STU	162	113.241
HG03644	STU	145	98.7093
HG03645	STU	155	108.217
HG03646	STU	156	111.833
HG03649	PJL	130	90.4899
HG03652	PJL	134	93.7968
HG03653	PJL	128	90.9698
HG03660	PJL	159	127.947
HG03663	PJL	168	126.75
HG03667	PJL	168	135.539
HG03668	PJL	161	116.663
HG03672	STU	193	194.209
HG03673	STU	141	97.0951
HG03679	STU	165	143.63
HG03680	STU	154	114.304
HG03681	STU	180	144.14
HG03684	STU	141	129.541
HG03685	STU	158	122.367
HG03686	STU	175	167.394
HG03687	STU	205	210.69
HG03689	STU	196	202.279
HG03690	STU	248	342.484
HG03691	STU	147	103.692
HG03692	STU	191	162.806
HG03693	STU	143	119.546
HG03694	STU	144	99.9121
HG03695	STU	167	167.753
HG03696	STU	285	468.542
HG03697	STU	155	146.132
HG03698	STU	165	137.147
HG03702	PJL	138	104.246
HG03703	PJL	143	104.383
HG03705	PJL	155	120.659
HG03706	PJL	146	122.195
HG03708	PJL	154	112.532
HG03709	PJL	146	100.115
HG03711	STU	211	225.824
HG03713	ITU	152	123.096
HG03714	ITU	148	110.128
HG03716	ITU	133	99.8708
HG03717	ITU	188	150.688
HG03718	ITU	211	168.147
HG03720	ITU	176	133.318
HG03722	ITU	199	215.829
HG03727	ITU	151	115.178
HG03729	ITU	147	111.599
HG03730	ITU	141	107.042
HG03731	ITU	157	114.516
HG03733	STU	211	232.348
HG03736	STU	141	104.057
HG03738	STU	211	245.069
HG03740	STU	257	300.955
HG03741	STU	213	196.744
HG03742	ITU	144	101.234
HG03743	STU	172	150.572
HG03744	STU	156	115.507
HG03745	STU	179	175.472
HG03746	STU	146	104.616
HG03750	STU	175	143.045
HG03752	STU	223	240.96
HG03753	STU	148	131.142
HG03754	STU	157	115.143
HG03755	STU	157	115.422
HG03756	STU	211	251.879
HG03757	STU	146	101.928
HG03760	STU	171	120.094
HG03762	PJL	160	115.03
HG03765	PJL	170	118.878
HG03767	PJL	182	149.232
HG03770	ITU	189	185.146
HG03771	ITU	159	113.251
HG03772	ITU	195	171.007
HG03773	ITU	194	161.241
HG03774	ITU	190	177.055
HG03775	ITU	189	152.841
HG03777	ITU	168	127.497
HG03778	ITU	137	97.562
HG03779	ITU	150	108.588
HG03780	ITU	160	114.96
HG03781	ITU	150	110.726
HG03782	ITU	184	131.732
HG03784	ITU	188	148.052
HG03785	ITU	218	166.653
HG03786	ITU	216	173.606
HG03787	ITU	148	105.051
HG03788	ITU	177	164.342
HG03789	ITU	158	114.828
HG03790	ITU	176	139.964
HG03792	ITU	189	164.321
HG03793	BEB	156	115.241
HG03796	BEB	136	96.3508
HG03800	BEB	126	87.7727
HG03802	BEB	144	112.542
HG03803	BEB	141	99.9012
HG03805	BEB	142	109.576
HG03808	BEB	157	113.491
HG03809	BEB	158	114.647
HG03812	BEB	155	108.517
HG03814	BEB	150	118.309
HG03815	BEB	132	90.4386
HG03817	BEB	182	168.711
HG03821	BEB	162	112.287
HG03823	BEB	165	114.18
HG03824	BEB	156	120.192
HG03826	BEB	154	120.897
HG03829	BEB	176	147.574
HG03830	BEB	153	114.065
HG03832	BEB	152	109.846
HG03833	BEB	154	105.273
HG03836	STU	240	257.288
HG03837	STU	312	447.276
HG03838	STU	198	218.23
HG03844	STU	186	179.806
HG03846	STU	168	119.242
HG03848	STU	161	114.718
HG03849	STU	158	119.12
HG03850	STU	164	136.416
HG03851	STU	166	120.675
HG03854	STU	229	251.877
HG03856	STU	174	121.667
HG03857	STU	144	100.777
HG03858	STU	242	300.377
HG03861	ITU	203	166.26
HG03862	ITU	297	402.97
HG03863	ITU	167	151.355
HG03864	ITU	156	120.65
HG03866	ITU	163	117.748
HG03867	ITU	210	227.558
HG03868	ITU	174	143.99
HG03869	ITU	164	121.743
HG03870	ITU	162	124.952
HG03871	ITU	154	119.178
HG03872	ITU	174	129.399
HG03873	ITU	164	114.179
HG03874	ITU	154	114.141
HG03875	ITU	226	248.58
HG03882	ITU	154	109.257
HG03884	STU	206	210.946
HG03885	STU	143	115.652
HG03886	STU	157	112.476
HG03887	STU	170	124.877
HG03888	STU	162	120.92
HG03890	STU	175	118.155
HG03894	STU	217	187.755
HG03895	STU	239	287.708
HG03896	STU	245	339.462
HG03897	STU	173	131.534
HG03898	STU	202	223.633
HG03899	STU	208	187.787
HG03900	STU	200	212.125
HG03902	BEB	157	109.827
HG03905	BEB	140	103.907
HG03907	BEB	178	144.425
HG03908	BEB	150	108.002
HG03910	BEB	194	192.89
HG03911	BEB	162	115.276
HG03913	BEB	157	108.393
HG03914	BEB	153	106.173
HG03916	BEB	143	108.766
HG03917	BEB	155	110.408
HG03919	BEB	146	104.567
HG03920	BEB	154	111.203
HG03922	BEB	138	99.6826
HG03925	BEB	144	109.274
HG03926	BEB	153	110.536
HG03928	BEB	149	105.324
HG03931	BEB	139	97.2898
HG03934	BEB	127	92.4906
HG03937	BEB	155	118.825
HG03940	BEB	151	114.664
HG03941	BEB	149	113.549
HG03943	STU	154	124.606
HG03944	STU	201	197.533
HG03945	STU	168	141.843
HG03947	STU	170	121.432
HG03949	STU	170	156.969
HG03950	STU	161	113.039
HG03951	STU	141	107.537
HG03953	STU	155	141.171
HG03955	STU	221	253.693
HG03960	ITU	157	114.695
HG03963	ITU	138	103.777
HG03965	ITU	150	106.827
HG03967	ITU	200	230.37
HG03968	ITU	158	120.98
HG03969	ITU	172	126.664
HG03971	ITU	156	112.048
HG03973	ITU	173	127.345
HG03974	ITU	139	97.4139
HG03976	ITU	152	111.009
HG03977	ITU	143	106.919
HG03978	ITU	162	109.44
HG03985	STU	207	220.232
HG03986	STU	153	110.982
HG03989	STU	183	156.682
HG03990	STU	179	130.727
HG03991	STU	181	147.076
HG03995	STU	176	141.184
HG03998	STU	148	102.415
HG03999	STU	158	109.505
HG04001	ITU	173	123.717
HG04002	ITU	167	123.369
HG04003	STU	171	120.109
HG04006	STU	146	102.913
HG04014	ITU	161	117.068
HG04015	ITU	180	134.855
HG04017	ITU	194	160.689
HG04018	ITU	151	124.504
HG04019	ITU	150	110.755
HG04020	ITU	162	131.797
HG04022	ITU	169	119.675
HG04023	ITU	255	209.14
HG04025	ITU	228	185.783
HG04026	ITU	217	208.166
HG04029	STU	208	189.382
HG04033	STU	162	119.469
HG04035	STU	159	154.857
HG04038	STU	190	161.917
HG04039	STU	158	117.726
HG04042	STU	164	121.349
HG04047	STU	149	110.67
HG04054	ITU	200	156.845
HG04056	ITU	288	368.033
HG04059	ITU	158	110.847
HG04060	ITU	158	116.248
HG04061	ITU	154	109.771
HG04062	ITU	155	115.536
HG04063	ITU	215	168.272
HG04070	ITU	330	535.534
HG04075	STU	178	160.381
HG04076	ITU	148	114.053
HG04080	ITU	160	119.597
HG04090	ITU	204	158.953
HG04093	ITU	188	156
HG04094	ITU	181	142.084
HG04096	ITU	251	274.134
HG04098	ITU	157	111.376
HG04099	STU	169	120.487
HG04100	STU	139	98.5642
HG04106	STU	202	184.883
HG04107	STU	190	181.31
HG04118	ITU	152	111.116
HG04131	BEB	162	118.882
HG04134	BEB	140	101.409
HG04140	BEB	163	123.635
HG04141	BEB	144	102.066
HG04144	BEB	152	105.628
HG04146	BEB	159	111.455
HG04152	BEB	193	223.343
HG04153	BEB	131	97.9872
HG04155	BEB	151	101.565
HG04156	BEB	145	101.181
HG04158	BEB	155	114.533
HG04159	BEB	177	126.459
HG04161	BEB	154	113.552
HG04162	BEB	143	101.224
HG04164	BEB	150	105.322
HG04171	BEB	123	84.534
HG04173	BEB	147	108.065
HG04176	BEB	132	95.4072
HG04177	BEB	148	107.031
HG04180	BEB	158	116.456
HG04182	BEB	147	108.655
HG04183	BEB	157	114.927
HG04185	BEB	161	120.298
HG04186	BEB	160	122.528
HG04188	BEB	151	107.952
HG04189	BEB	146	101.893
HG04194	BEB	118	86.2055
HG04195	BEB	140	96.7095
HG04198	ITU	161	115.7
HG04200	ITU	154	118.21
HG04202	ITU	164	135.615
HG04206	ITU	169	139.673
HG04209	ITU	237	276.607
HG04210	STU	159	110.829
HG04211	ITU	317	509.237
HG04212	ITU	184	191.844
HG04214	ITU	159	119.313
HG04216	ITU	153	110.611
HG04219	ITU	162	120.073
HG04222	ITU	150	107.563
HG04225	ITU	160	115.21
HG04227	STU	146	107.952
HG04229	STU	142	98.9063
HG04235	ITU	166	122.62
HG04238	ITU	146	105.794
HG04239	ITU	154	108.529
NA06984	CEU	179	131.068
NA06985	CEU	163	119.577
NA06986	CEU	162	117.803
NA06989	CEU	197	147.038
NA06994	CEU	196	145.646
NA07000	CEU	171	121.246
NA07037	CEU	181	135.666
NA07048	CEU	184	133.403
NA07051	CEU	203	151.571
NA07056	CEU	196	153.867
NA07347	CEU	191	142.033
NA07357	CEU	180	133.563
NA10847	CEU	179	127.479
NA10851	CEU	213	161.335
NA11829	CEU	187	133.539
NA11830	CEU	202	148.078
NA11831	CEU	199	149.142
NA11832	CEU	164	118.219
NA11840	CEU	191	141.183
NA11843	CEU	175	126.398
NA11881	CEU	200	149.108
NA11892	CEU	181	128.615
NA11893	CEU	183	140.894
NA11894	CEU	184	135.391
NA11918	CEU	171	124.812
NA11919	CEU	178	126.315
NA11920	CEU	170	125.7
NA11930	CEU	177	123.357
NA11931	CEU	180	131.18
NA11932	CEU	170	124.262
NA11933	CEU	167	117.34
NA11992	CEU	184	132.482
NA11994	CEU	169	122.399
NA11995	CEU	199	148.829
NA12003	CEU	196	150.44
NA12004	CEU	169	118.558
NA12005	CEU	197	152.552
NA12006	CEU	170	125.179
NA12043	CEU	218	155.615
NA12044	CEU	178	131.187
NA12045	CEU	152	107.556
NA12046	CEU	185	131.301
NA12058	CEU	196	144.808
NA12144	CEU	204	152.049
NA12154	CEU	191	136.88
NA12155	CEU	187	136.3
NA12156	CEU	205	149.523
NA12234	CEU	196	141.497
NA12249	CEU	217	159.409
NA12272	CEU	201	143.384
NA12273	CEU	169	118.556
NA12275	CEU	163	121.554
NA12282	CEU	197	144.231
NA12283	CEU	200	147.439
NA12286	CEU	166	121.499
NA12287	CEU	175	126.979
NA12340	CEU	201	142.179
NA12341	CEU	181	129.454
NA12342	CEU	223	212.802
NA12347	CEU	167	122.974
NA12348	CEU	182	137.484
NA12383	CEU	188	137.562
NA12399	CEU	199	147.507
NA12400	CEU	190	133.672
NA12413	CEU	173	126.211
NA12414	CEU	194	146.682
NA12489	CEU	178	133.176
NA12546	CEU	187	138.105
NA12716	CEU	206	153.903
NA12717	CEU	212	148.154
NA12718	CEU	182	134.03
NA12748	CEU	183	128.565
NA12749	CEU	183	130.423
NA12750	CEU	185	143.992
NA12751	CEU	172	127.854
NA12760	CEU	203	146.227
NA12761	CEU	169	119.386
NA12762	CEU	184	131.97
NA12763	CEU	173	128.766
NA12775	CEU	181	128.218
NA12776	CEU	191	136.734
NA12777	CEU	202	144.262
NA12778	CEU	199	147.423
NA12812	CEU	173	129.111
NA12813	CEU	197	138.297
NA12814	CEU	207	150.925
NA12815	CEU	188	133.754
NA12827	CEU	192	146.135
NA12828	CEU	188	137.363
NA12829	CEU	195	138.295
NA12830	CEU	164	119.394
NA12842	CEU	167	124.202
NA12843	CEU	181	135.353
NA12872	CEU	185	135.68
NA12873	CEU	178	126.186
NA12874	CEU	237	237.927
NA12878	CEU	193	148.499
NA12889	CEU	164	117.801
NA12890	CEU	178	136.702
NA18525	CHB	221	162.966
NA18526	CHB	216	156.797
NA18528	CHB	226	165.384
NA18530	CHB	221	162.684
NA18531	CHB	225	162.504
NA18532	CHB	211	153.26
NA18533	CHB	222	158.558
NA18534	CHB	257	185.019
NA18535	CHB	235	169.403
NA18536	CHB	242	181.038
NA18537	CHB	234	171.179
NA18538	CHB	203	148.806
NA18539	CHB	237	176.183
NA18541	CHB	242	175.022
NA18542	CHB	212	155.561
NA18543	CHB	189	139.445
NA18544	CHB	219	158.087
NA18545	CHB	224	163.422
NA18546	CHB	211	149.266
NA18547	CHB	215	163.001
NA18548	CHB	232	168.164
NA18549	CHB	218	154.313
NA18550	CHB	217	158.17
NA18552	CHB	207	154.953
NA18553	CHB	197	139.553
NA18555	CHB	229	167.752
NA18557	CHB	256	201.331
NA18558	CHB	217	158.203
NA18559	CHB	223	163.92
NA18560	CHB	206	149.058
NA18561	CHB	225	163.785
NA18562	CHB	237	173.187
NA18563	CHB	198	137.213
NA18564	CHB	204	142.208
NA18565	CHB	230	171.446
NA18566	CHB	224	163.29
NA18567	CHB	229	169.739
NA18570	CHB	221	155.986
NA18571	CHB	224	159.033
NA18572	CHB	245	175.893
NA18573	CHB	201	148.662
NA18574	CHB	215	156.084
NA18577	CHB	216	155.733
NA18579	CHB	201	144.688
NA18582	CHB	243	173.624
NA18591	CHB	231	175.497
NA18592	CHB	244	173.69
NA18593	CHB	212	161.354
NA18595	CHB	244	180.967
NA18596	CHB	224	167.212
NA18597	CHB	204	147.163
NA18599	CHB	205	145.255
NA18602	CHB	233	170.764
NA18603	CHB	218	157.592
NA18605	CHB	219	158.993
NA18606	CHB	247	249.02
NA18608	CHB	214	152.172
NA18609	CHB	225	163.497
NA18610	CHB	228	166.055
NA18611	CHB	247	171.938
NA18612	CHB	219	161.913
NA18613	CHB	238	176.565
NA18614	CHB	217	155.052
NA18615	CHB	201	148.595
NA18616	CHB	198	144.437
NA18617	CHB	211	158.234
NA18618	CHB	221	166.566
NA18619	CHB	255	190.717
NA18620	CHB	239	173.486
NA18621	CHB	195	144.362
NA18622	CHB	210	152.661
NA18623	CHB	205	148.1
NA18624	CHB	190	140.676
NA18625	CHB	211	160.432
NA18626	CHB	206	157.78
NA18627	CHB	238	194.759
NA18628	CHB	200	145.894
NA18629	CHB	216	161.989
NA18630	CHB	237	182.534
NA18631	CHB	207	151.221
NA18632	CHB	226	168.921
NA18633	CHB	226	156.896
NA18634	CHB	232	164.748
NA18635	CHB	213	151.925
NA18636	CHB	216	154.074
NA18637	CHB	201	144.933
NA18638	CHB	195	142.467
NA18639	CHB	226	172.373
NA18640	CHB	232	161.503
NA18641	CHB	230	170.342
NA18642	CHB	247	179.11
NA18643	CHB	231	166.994
NA18644	CHB	238	178.189
NA18645	CHB	244	179.608
NA18646	CHB	239	171.064
NA18647	CHB	228	166.825
NA18648	CHB	252	182.163
NA18740	CHB	210	160.259
NA18745	CHB	213	158.181
NA18747	CHB	229	175.394
NA18748	CHB	211	154.269
NA18749	CHB	225	169.925
NA18757	CHB	240	176.907
NA18939	JPT	212	163.213
NA18940	JPT	227	159.929
NA18941	JPT	236	179.727
NA18942	JPT	237	174.512
NA18943	JPT	211	153.228
NA18944	JPT	253	188.335
NA18945	JPT	225	165.328
NA18946	JPT	215	159.006
NA18947	JPT	219	157.38
NA18948	JPT	235	173.475
NA18949	JPT	243	172.654
NA18950	JPT	207	152.545
NA18951	JPT	241	181.014
NA18952	JPT	233	170.334
NA18953	JPT	234	172.188
NA18954	JPT	227	172.082
NA18956	JPT	236	177.849
NA18957	JPT	244	187.342
NA18959	JPT	210	150.433
NA18960	JPT	215	153.138
NA18961	JPT	226	170.739
NA18962	JPT	234	168.779
NA18963	JPT	227	159.269
NA18964	JPT	237	174.371
NA18965	JPT	237	167.687
NA18966	JPT	202	145.456
NA18967	JPT	247	187.679
NA18968	JPT	256	180.671
NA18969	JPT	265	198.79
NA18970	JPT	244	180.757
NA18971	JPT	225	165.706
NA18972	JPT	250	190.367
NA18973	JPT	232	169.924
NA18974	JPT	221	170.875
NA18975	JPT	219	157.532
NA18976	JPT	223	159.114
NA18977	JPT	208	161.778
NA18978	JPT	226	164.073
NA18979	JPT	232	172.575
NA18980	JPT	208	156.81
NA18981	JPT	214	161.432
NA18982	JPT	203	152.417
NA18983	JPT	213	149.085
NA18984	JPT	273	249.598
NA18985	JPT	245	181.938
NA18986	JPT	193	140.841
NA18987	JPT	284	296.277
NA18988	JPT	228	166.887
NA18989	JPT	206	152.889
NA18990	JPT	214	163.326
NA18991	JPT	227	166.531
NA18992	JPT	306	322.977
NA18993	JPT	229	167.204
NA18994	JPT	256	194.074
NA18995	JPT	258	187.721
NA18997	JPT	256	189.616
NA18998	JPT	235	169.392
NA18999	JPT	217	156.249
NA19000	JPT	194	137.036
NA19001	JPT	202	146.932
NA19002	JPT	219	170.95
NA19003	JPT	241	177.236
NA19004	JPT	213	151.111
NA19005	JPT	197	139.818
NA19006	JPT	238	178.876
NA19007	JPT	214	159.214
NA19009	JPT	244	187.363
NA19010	JPT	229	165.81
NA19011	JPT	221	162.979
NA19012	JPT	344	409.727
NA19054	JPT	218	158.423
NA19055	JPT	196	140.5
NA19056	JPT	234	169.541
NA19057	JPT	190	139.621
NA19058	JPT	219	156.799
NA19059	JPT	244	174.996
NA19060	JPT	227	166.44
NA19062	JPT	197	148.271
NA19063	JPT	211	156.554
NA19064	JPT	231	164.137
NA19065	JPT	237	177.309
NA19066	JPT	207	144.363
NA19067	JPT	220	158.404
NA19068	JPT	208	150.615
NA19070	JPT	227	164.832
NA19072	JPT	218	161.379
NA19074	JPT	248	184.044
NA19075	JPT	260	191.479
NA19076	JPT	275	206.37
NA19077	JPT	232	170.54
NA19078	JPT	237	179.03
NA19079	JPT	227	173.921
NA19080	JPT	247	186.21
NA19081	JPT	243	187.281
NA19082	JPT	239	172.293
NA19083	JPT	222	160.746
NA19084	JPT	247	179.558
NA19085	JPT	208	158.702
NA19086	JPT	242	181.568
NA19087	JPT	235	174.583
NA19088	JPT	233	173.82
NA19089	JPT	231	173.729
NA19090	JPT	246	177.501
NA19091	JPT	271	202.362
NA20502	TSI	218	177.932
NA20503	TSI	164	123.409
NA20504	TSI	173	129.457
NA20505	TSI	193	139.231
NA20506	TSI	168	122.565
NA20507	TSI	182	142.701
NA20508	TSI	165	116.22
NA20509	TSI	195	155.96
NA20510	TSI	160	119.705
NA20511	TSI	192	137.695
NA20512	TSI	176	128.665
NA20513	TSI	189	139.99
NA20514	TSI	193	146.801
NA20515	TSI	157	117.702
NA20516	TSI	204	148.161
NA20517	TSI	192	145.61
NA20518	TSI	179	127.616
NA20519	TSI	193	141.725
NA20520	TSI	176	129.386
NA20521	TSI	189	132.868
NA20522	TSI	172	130.96
NA20524	TSI	205	144.04
NA20525	TSI	180	130.636
NA20527	TSI	180	134.255
NA20528	TSI	194	134.714
NA20529	TSI	170	123.366
NA20530	TSI	174	123.64
NA20531	TSI	198	136.94
NA20532	TSI	179	126.19
NA20533	TSI	192	139.406
NA20534	TSI	175	134.693
NA20535	TSI	178	127.252
NA20536	TSI	192	140.716
NA20538	TSI	171	129.456
NA20539	TSI	182	133.855
NA20540	TSI	175	131.836
NA20541	TSI	171	122.365
NA20542	TSI	206	156.955
NA20543	TSI	166	115.646
NA20544	TSI	171	124.06
NA20581	TSI	165	117.161
NA20582	TSI	191	153.433
NA20585	TSI	224	249.632
NA20586	TSI	174	121.718
NA20587	TSI	177	125.811
NA20588	TSI	179	126.905
NA20589	TSI	178	129.474
NA20752	TSI	160	106.705
NA20753	TSI	172	123.963
NA20754	TSI	160	112.6
NA20755	TSI	176	122.344
NA20756	TSI	199	137.572
NA20757	TSI	177	126.096
NA20758	TSI	157	117.696
NA20759	TSI	153	109.336
NA20760	TSI	166	123.267
NA20761	TSI	174	128.724
NA20762	TSI	162	123.389
NA20763	TSI	178	123.747
NA20764	TSI	172	126.874
NA20765	TSI	168	117.979
NA20766	TSI	172	128.848
NA20767	TSI	171	118.129
NA20768	TSI	166	121.782
NA20769	TSI	180	136.124
NA20770	TSI	148	106.739
NA20771	TSI	164	123.575
NA20772	TSI	176	127.251
NA20773	TSI	190	138.275
NA20774	TSI	186	129.082
NA20775	TSI	168	124.617
NA20778	TSI	174	128.392
NA20783	TSI	182	131.798
NA20785	TSI	169	117.934
NA20786	TSI	166	115.751
NA20787	TSI	186	145.346
NA20790	TSI	168	120.799
NA20792	TSI	171	120.342
NA20795	TSI	171	116.815
NA20796	TSI	190	145.238
NA20797	TSI	168	119.443
NA20798	TSI	192	133.433
NA20799	TSI	156	112.605
NA20800	TSI	182	126.081
NA20801	TSI	157	114.104
NA20802	TSI	186	138.446
NA20803	TSI	183	131.688
NA20804	TSI	165	117.512
NA20805	TSI	188	142.617
NA20806	TSI	183	134.82
NA20807	TSI	172	122.945
NA20808	TSI	183	131.376
NA20809	TSI	174	125.827
NA20810	TSI	173	126.053
NA20811	TSI	174	120.557
NA20812	TSI	191	147.748
NA20813	TSI	171	119.045
NA20814	TSI	175	127.186
NA20815	TSI	168	120.377
NA20818	TSI	181	135.368
NA20819	TSI	182	144.148
NA20821	TSI	177	129.413
NA20822	TSI	164	118.377
NA20826	TSI	168	138.155
NA20827	TSI	194	145.735
NA20828	TSI	191	138.084
NA20832	TSI	175	129.092
NA20845	GIH	158	108.006
NA20846	GIH	193	148.511
NA20847	GIH	162	120.227
NA20849	GIH	163	123.917
NA20850	GIH	169	126.249
NA20851	GIH	188	139.735
NA20852	GIH	205	157.677
NA20853	GIH	169	120.601
NA20854	GIH	154	113.962
NA20856	GIH	167	121.42
NA20858	GIH	162	123.763
NA20859	GIH	165	126.385
NA20861	GIH	189	148.357
NA20862	GIH	149	117.818
NA20863	GIH	176	132.921
NA20864	GIH	162	116.784
NA20866	GIH	163	123.901
NA20867	GIH	181	147.05
NA20868	GIH	182	131.822
NA20869	GIH	184	145.873
NA20870	GIH	180	133.136
NA20872	GIH	197	157.634
NA20874	GIH	164	117.894
NA20875	GIH	158	125.684
NA20876	GIH	168	127.989
NA20877	GIH	184	148.459
NA20878	GIH	161	119.717
NA20881	GIH	163	122.04
NA20882	GIH	158	127.482
NA20884	GIH	154	145.443
NA20885	GIH	158	119.813
NA20886	GIH	215	194.273
NA20887	GIH	162	131.934
NA20888	GIH	183	141.224
NA20889	GIH	163	127.197
NA20890	GIH	187	159.091
NA20891	GIH	205	158.595
NA20892	GIH	158	127.131
NA20894	GIH	170	145.878
NA20895	GIH	173	136.352
NA20896	GIH	171	127.49
NA20897	GIH	175	133.237
NA20899	GIH	168	132.932
NA20900	GIH	143	114.971
NA20901	GIH	158	114.245
NA20902	GIH	162	132.593
NA20903	GIH	172	137.403
NA20904	GIH	140	98.0882
NA20905	GIH	171	131.608
NA20906	GIH	169	120.262
NA20908	GIH	180	135.895
NA20910	GIH	179	147.099
NA20911	GIH	160	120.653
NA21086	GIH	156	117.516
NA21087	GIH	175	128.027
NA21088	GIH	165	125.609
NA21089	GIH	174	137.438
NA21090	GIH	159	127.691
NA21091	GIH	172	135.203
NA21092	GIH	173	128.163
NA21093	GIH	203	147.884
NA21094	GIH	182	142.633
NA21095	GIH	220	207.022
NA21097	GIH	200	167.798
NA21098	GIH	183	148.987
NA21099	GIH	162	128.199
NA21100	GIH	181	138.072
NA21101	GIH	166	123.354
NA21102	GIH	183	145.856
NA21103	GIH	164	130.24
NA21104	GIH	173	135.905
NA21105	GIH	167	129.007
NA21106	GIH	173	136.45
NA21107	GIH	160	119.104
NA21108	GIH	191	175.66
NA21109	GIH	186	169.809
NA21110	GIH	170	141.725
NA21111	GIH	165	130.553
NA21112	GIH	168	126.663
NA21113	GIH	178	139.868
NA21114	GIH	156	119.755
NA21115	GIH	178	124.517
NA21116	GIH	161	119.091
NA21117	GIH	151	127.2
NA21118	GIH	172	123.897
NA21119	GIH	172	133.939
NA21120	GIH	182	139.933
NA21122	GIH	163	133.13
NA21123	GIH	169	132.328
NA21124	GIH	176	125.592
NA21125	GIH	165	128.894
NA21126	GIH	173	131.321
NA21127	GIH	154	117.347
NA21128	GIH	169	125.343
NA21129	GIH	173	134.898
NA21130	GIH	187	134.526
NA21133	GIH	173	128.165
NA21135	GIH	172	129.237
NA21137	GIH	162	124.413
NA21141	GIH	185	137.669
NA21142	GIH	189	158.326
NA21143	GIH	158	121.482
NA21144	GIH	202	160.207
HG00551	PUR	159	121.967
HG00553	PUR	126	97.7231
HG00554	PUR	159	117.537
HG00637	PUR	122	93.153
HG00638	PUR	118	98.78
HG00640	PUR	174	156.687
HG00641	PUR	152	124.142
HG00731	PUR	167	120.373
HG00732	PUR	151	129.781
HG00734	PUR	159	135.629
HG00736	PUR	153	109.517
HG00737	PUR	153	112.366
HG00739	PUR	166	116.907
HG00740	PUR	139	107.295
HG00742	PUR	143	111.183
HG00743	PUR	144	120.383
HG01047	PUR	119	85.2326
HG01048	PUR	139	107.883
HG01049	PUR	102	75.4014
HG01051	PUR	109	78.7379
HG01052	PUR	116	89.7507
HG01054	PUR	137	112.119
HG01055	PUR	127	97.8916
HG01058	PUR	130	104.425
HG01060	PUR	152	121.782
HG01061	PUR	177	143.691
HG01063	PUR	99	75.9351
HG01064	PUR	130	105.402
HG01066	PUR	161	114.65
HG01067	PUR	166	142.878
HG01069	PUR	148	108.497
HG01070	PUR	157	122.495
HG01072	PUR	161	122.689
HG01073	PUR	148	106.527
HG01075	PUR	133	102.371
HG01077	PUR	129	100.778
HG01079	PUR	133	113.959
HG01080	PUR	133	95.7443
HG01082	PUR	112	83.517
HG01083	PUR	143	105.115
HG01085	PUR	142	101.971
HG01086	PUR	138	121.383
HG01088	PUR	121	92.2557
HG01089	PUR	136	96.7497
HG01092	PUR	94	71.8085
HG01094	PUR	143	99.4599
HG01095	PUR	136	97.0135
HG01097	PUR	159	125.412
HG01098	PUR	145	113.55
HG01101	PUR	145	116.755
HG01102	PUR	146	115.012
HG01104	PUR	143	105.147
HG01105	PUR	164	135.867
HG01107	PUR	109	86.0737
HG01108	PUR	51	34.5556
HG01110	PUR	141	105.952
HG01111	PUR	133	95.4044
HG01112	CLM	199	177.285
HG01113	CLM	152	114.072
HG01119	CLM	160	131.648
HG01121	CLM	171	120.432
HG01122	CLM	145	108.606
HG01124	CLM	147	106.934
HG01125	CLM	149	108.332
HG01130	CLM	156	116.226
HG01131	CLM	165	128.097
HG01133	CLM	169	129.627
HG01134	CLM	148	111.302
HG01136	CLM	133	97.9598
HG01137	CLM	201	170.618
HG01139	CLM	131	96.1475
HG01140	CLM	162	143.555
HG01142	CLM	136	113.608
HG01148	CLM	229	313.472
HG01149	CLM	155	116.197
HG01161	PUR	148	107.929
HG01162	PUR	152	114.499
HG01164	PUR	174	138.696
HG01167	PUR	109	78.185
HG01168	PUR	156	109.402
HG01170	PUR	145	107.544
HG01171	PUR	137	97.3125
HG01173	PUR	164	117.029
HG01174	PUR	167	161.918
HG01176	PUR	139	99.2443
HG01177	PUR	165	131.049
HG01182	PUR	144	107.426
HG01183	PUR	152	134.34
HG01187	PUR	123	107.145
HG01188	PUR	102	82.9731
HG01190	PUR	129	99.0667
HG01191	PUR	161	136.669
HG01197	PUR	169	127.992
HG01198	PUR	191	225.477
HG01200	PUR	200	186.136
HG01204	PUR	129	97.9125
HG01205	PUR	128	88.1277
HG01241	PUR	44	39.6727
HG01242	PUR	49	35.0577
HG01247	PUR	125	96.3379
HG01248	PUR	137	105.984
HG01250	CLM	171	134.13
HG01251	CLM	170	134.935
HG01253	CLM	149	114.4
HG01254	CLM	145	105.833
HG01256	CLM	151	111.271
HG01257	CLM	172	142.681
HG01259	CLM	156	147.535
HG01260	CLM	150	102.428
HG01269	CLM	176	159.264
HG01271	CLM	145	108.603
HG01272	CLM	131	98.7113
HG01275	CLM	222	278.916
HG01277	CLM	192	164.774
HG01280	CLM	183	146.515
HG01281	CLM	172	121.912
HG01284	CLM	162	121.019
HG01286	PUR	123	98.7567
HG01302	PUR	149	108.053
HG01303	PUR	146	125.628
HG01305	PUR	146	111.68
HG01308	PUR	94	81.9399
HG01311	PUR	149	114.002
HG01312	PUR	164	124.657
HG01323	PUR	138	108.01
HG01325	PUR	155	138.457
HG01326	PUR	146	106.162
HG01341	CLM	216	163.887
HG01342	CLM	84	65.8962
HG01344	CLM	223	208.868
HG01345	CLM	178	143.798
HG01348	CLM	214	218.49
HG01350	CLM	193	188.193
HG01351	CLM	196	160.174
HG01353	CLM	153	117.7
HG01354	CLM	165	132.214
HG01356	CLM	166	124.104
HG01357	CLM	183	150.861
HG01359	CLM	160	125.923
HG01360	CLM	156	118.756
HG01362	CLM	129	89.8528
HG01363	CLM	150	144.005
HG01365	CLM	135	99.3857
HG01366	CLM	152	109.168
HG01369	CLM	233	187.391
HG01372	CLM	184	162.611
HG01374	CLM	186	166.86
HG01375	CLM	153	109.726
HG01377	CLM	154	119.192
HG01378	CLM	210	183.455
HG01383	CLM	189	178.642
HG01384	CLM	187	151.371
HG01389	CLM	221	281.459
HG01390	CLM	114	84.4806
HG01392	PUR	134	97.3049
HG01393	PUR	113	83.4232
HG01395	PUR	170	133.584
HG01396	PUR	137	112.726
HG01398	PUR	181	221.189
HG01402	PUR	127	93.8509
HG01403	PUR	125	101.694
HG01405	PUR	155	116.721
HG01412	PUR	153	108.352
HG01413	PUR	169	134.461
HG01414	PUR	130	100.688
HG01431	CLM	141	103.927
HG01432	CLM	203	193.004
HG01435	CLM	175	136.914
HG01437	CLM	181	148.61
HG01438	CLM	215	210.064
HG01440	CLM	131	99.5519
HG01441	CLM	182	135.29
HG01443	CLM	229	171.433
HG01444	CLM	162	125.266
HG01447	CLM	172	124.373
HG01455	CLM	154	119.344
HG01456	CLM	171	124.56
HG01459	CLM	156	116.011
HG01461	CLM	130	106.003
HG01462	CLM	106	83.8417
HG01464	CLM	133	94.5628
HG01465	CLM	191	172.417
HG01468	CLM	258	321.699
HG01474	CLM	183	148.896
HG01479	CLM	188	135.678
HG01485	CLM	97	68.8002
HG01486	CLM	165	122.393
HG01488	CLM	126	103.228
HG01489	CLM	162	118.876
HG01491	CLM	246	271.187
HG01492	CLM	174	129.368
HG01494	CLM	194	149.995
HG01495	CLM	173	127.96
HG01497	CLM	200	172.468
HG01498	CLM	187	166.091
HG01550	CLM	174	129.358
HG01551	CLM	76	57.337
HG01556	CLM	130	94.8098
HG01565	PEL	249	194.713
HG01566	PEL	215	183.862
HG01571	PEL	289	227.694
HG01572	PEL	405	317.508
HG01577	PEL	177	134.075
HG01578	PEL	235	176.243
HG01892	PEL	257	195.424
HG01893	PEL	202	149.16
HG01917	PEL	316	240.743
HG01918	PEL	296	234.782
HG01920	PEL	436	347.59
HG01921	PEL	284	223.335
HG01923	PEL	395	326.387
HG01924	PEL	210	160.759
HG01926	PEL	450	361.402
HG01927	PEL	356	268.182
HG01932	PEL	348	268.556
HG01933	PEL	225	170.56
HG01935	PEL	285	245.56
HG01936	PEL	252	197.634
HG01938	PEL	410	318.941
HG01939	PEL	293	220.771
HG01941	PEL	315	246.406
HG01942	PEL	373	286.731
HG01944	PEL	227	166.487
HG01945	PEL	349	267.893
HG01947	PEL	242	181.118
HG01948	PEL	169	126.116
HG01950	PEL	329	259.89
HG01951	PEL	396	319.516
HG01953	PEL	337	270.58
HG01954	PEL	360	276.193
HG01961	PEL	423	346.684
HG01965	PEL	191	141.771
HG01967	PEL	224	166.515
HG01968	PEL	376	298.976
HG01970	PEL	377	486.585
HG01971	PEL	190	139.64
HG01973	PEL	286	221.28
HG01974	PEL	359	273.851
HG01976	PEL	257	195.628
HG01977	PEL	318	240.48
HG01979	PEL	268	207.412
HG01980	PEL	275	212.855
HG01982	PEL	287	229.728
HG01991	PEL	309	237.546
HG01992	PEL	356	272.27
HG01997	PEL	382	295.088
HG02002	PEL	295	233.095
HG02003	PEL	311	254.925
HG02006	PEL	67	53.008
HG02008	PEL	317	245.801
HG02089	PEL	247	185.915
HG02090	PEL	203	159.283
HG02102	PEL	342	273.395
HG02104	PEL	356	288.618
HG02105	PEL	388	330.86
HG02146	PEL	383	354.142
HG02147	PEL	399	317.399
HG02150	PEL	389	311.775
HG02252	PEL	252	192.356
HG02253	PEL	248	185.247
HG02259	PEL	423	321.974
HG02260	PEL	326	254.959
HG02262	PEL	303	223.084
HG02265	PEL	395	315.262
HG02266	PEL	383	305.377
HG02271	PEL	388	311.998
HG02272	PEL	480	400.636
HG02274	PEL	147	110.781
HG02275	PEL	402	333.269
HG02277	PEL	281	220.467
HG02278	PEL	351	276.428
HG02285	PEL	298	240.153
HG02286	PEL	267	206.222
HG02291	PEL	454	363.347
HG02292	PEL	349	267.242
HG02298	PEL	256	199.872
HG02299	PEL	352	280.934
HG02301	PEL	275	217.101
HG02304	PEL	274	213.579
HG02312	PEL	222	165.075
HG02345	PEL	163	122.382
HG02348	PEL	328	252.279
HG02425	PEL	217	160.622
NA19648	MXL	204	210.942
NA19649	MXL	190	171.009
NA19651	MXL	152	112.07
NA19652	MXL	169	122.567
NA19654	MXL	194	152.158
NA19655	MXL	167	128.488
NA19657	MXL	201	154.645
NA19658	MXL	187	135.43
NA19661	MXL	176	127.89
NA19663	MXL	223	168.163
NA19664	MXL	212	160.587
NA19669	MXL	182	149.028
NA19670	MXL	203	153
NA19676	MXL	163	117.683
NA19678	MXL	121	88.4561
NA19679	MXL	229	281.538
NA19681	MXL	211	165.229
NA19682	MXL	216	163.847
NA19684	MXL	131	95.7253
NA19716	MXL	208	164.334
NA19717	MXL	203	153.741
NA19719	MXL	173	125.005
NA19720	MXL	219	165.568
NA19722	MXL	168	124.007
NA19723	MXL	189	138.273
NA19725	MXL	171	128.432
NA19726	MXL	203	153.187
NA19728	MXL	383	321.708
NA19729	MXL	314	252.018
NA19731	MXL	371	286.35
NA19732	MXL	423	371.366
NA19734	MXL	225	171.094
NA19735	MXL	333	262.058
NA19740	MXL	261	203.565
NA19741	MXL	299	233.302
NA19746	MXL	244	184.358
NA19747	MXL	208	150.246
NA19749	MXL	177	133.143
NA19750	MXL	188	149.031
NA19752	MXL	205	152.511
NA19755	MXL	244	180.677
NA19756	MXL	176	132.349
NA19758	MXL	275	214.953
NA19759	MXL	237	185.259
NA19761	MXL	218	172.676
NA19762	MXL	186	135.936
NA19764	MXL	154	117.297
NA19770	MXL	165	124.793
NA19771	MXL	209	156.754
NA19773	MXL	186	134.87
NA19774	MXL	180	135.631
NA19776	MXL	145	104.827
NA19777	MXL	158	116.414
NA19779	MXL	153	112.05
NA19780	MXL	190	162.241
NA19782	MXL	167	126.917
NA19783	MXL	274	209.67
NA19785	MXL	256	199.175
NA19786	MXL	200	151.738
NA19788	MXL	207	156.921
NA19789	MXL	175	132.967
NA19792	MXL	183	127.285
NA19794	MXL	185	140.2
NA19795	MXL	162	121.192

## Sheet: Fig 3b
Linkage disequilibrium
POP	Distance [bp]	Relative LD
WHG	5000	1.38463
WHG	10000	1.07468
WHG	15000	1.04139
WHG	20000	1.44627
CHG	5000	0.572137
CHG	10000	0.418778
CHG	15000	0.279246
CHG	20000	0.399823
SF	5000	0.800148
SF	10000	0.687143
SF	15000	0.0122738
SF	20000	0.291194
Hum	5000	0.850952
Hum	10000	0.380778
Hum	15000	0.480531
Hum	20000	-0.242332
EN_Hungary	5000	-0.75131
EN_Hungary	10000	-1.25623
EN_Hungary	15000	-1.46351
EN_Hungary	20000	-2.0857

## Sheet: Fig 3c
Effective population size over time inferred by MSMC
Stuttgart					Loschbour					SF12					Ust_Ishim
time_index	left_time_boundary	right_time_boundary	lambda_00		time_index	left_time_boundary	right_time_boundary	lambda_00		time_index	left_time_boundary	right_time_boundary	lambda_00		time_index	left_time_boundary	right_time_boundary	lambda_00
0	0	9.19793e-06	1117.26		0	0	7.195e-06	15932.4		0	0	8.63123e-06	15212.6		0	0	9.77604e-06	20730.6
1	9.19793e-06	1.86348e-05	11666.1		1	7.195e-06	1.45769e-05	30895.5		1	8.63123e-06	1.74867e-05	19934.3		1	9.77604e-06	1.9806e-05	8184.6
2	1.86348e-05	2.83233e-05	18283.5		2	1.45769e-05	2.21557e-05	24012.8		2	1.74867e-05	2.65783e-05	16053.5		2	1.9806e-05	3.01035e-05	4640.14
3	2.83233e-05	3.82774e-05	9294.22		3	2.21557e-05	2.99421e-05	12397.1		3	2.65783e-05	3.5919e-05	7386.47		3	3.01035e-05	4.06832e-05	2405.99
4	3.82774e-05	4.85118e-05	4376.64		4	2.99421e-05	3.79479e-05	6397.55		4	3.5919e-05	4.55229e-05	3609.41		4	4.06832e-05	5.15609e-05	1689.23
5	4.85118e-05	5.90429e-05	2606.32		5	3.79479e-05	4.61858e-05	3749.61		5	4.55229e-05	5.54052e-05	2267.85		5	5.15609e-05	6.27539e-05	1395.85
6	5.90429e-05	6.98885e-05	1905.05		6	4.61858e-05	5.46697e-05	2557.68		6	5.54052e-05	6.55825e-05	1724.4		6	6.27539e-05	7.42811e-05	1254.99
7	6.98885e-05	8.10678e-05	1592.21		7	5.46697e-05	6.34146e-05	1977.75		7	6.55825e-05	7.60731e-05	1476.12		7	7.42811e-05	8.61631e-05	1193.02
8	8.10678e-05	9.26021e-05	1449.98		8	6.34146e-05	7.24372e-05	1677.03		8	7.60731e-05	8.68967e-05	1358.11		8	8.61631e-05	9.84223e-05	1182.57
9	9.26021e-05	0.000104515	1396.21		9	7.24372e-05	8.17556e-05	1519.06		9	8.68967e-05	9.80752e-05	1307.76		9	9.84223e-05	0.000111084	1207.64
10	0.000104515	0.000116831	1408.8		10	8.17556e-05	9.139e-05	1427.65		10	9.80752e-05	0.000109633	1306.68		10	0.000111084	0.000124174	1290.92
11	0.000116831	0.00012958	1408.8		11	9.139e-05	0.000101363	1427.65		11	0.000109633	0.000121596	1306.68		11	0.000124174	0.000137724	1290.92
12	0.00012958	0.000142792	1502.2		12	0.000101363	0.000111698	1432.92		12	0.000121596	0.000133994	1375.11		12	0.000137724	0.000151767	1440.24
13	0.000142792	0.000156503	1502.2		13	0.000111698	0.000122423	1432.92		13	0.000133994	0.000146861	1375.11		13	0.000151767	0.000166339	1440.24
14	0.000156503	0.000170752	1635.81		14	0.000122423	0.000133569	1513.8		14	0.000146861	0.000160231	1489.35		14	0.000166339	0.000181484	1607.8
15	0.000170752	0.000185582	1635.81		15	0.000133569	0.00014517	1513.8		15	0.000160231	0.000174148	1489.35		15	0.000181484	0.000197247	1607.8
16	0.000185582	0.000201044	1779.43		16	0.00014517	0.000157265	1630.87		16	0.000174148	0.000188658	1624.5		16	0.000197247	0.00021368	1773.81
17	0.000201044	0.000217194	1779.43		17	0.000157265	0.000169898	1630.87		17	0.000188658	0.000203812	1624.5		17	0.00021368	0.000230845	1773.81
18	0.000217194	0.000234094	1917.96		18	0.000169898	0.000183118	1762.35		18	0.000203812	0.000219671	1764.83		18	0.000230845	0.000248807	1927.53
19	0.000234094	0.00025182	1917.96		19	0.000183118	0.000196984	1762.35		19	0.000219671	0.000236305	1764.83		19	0.000248807	0.000267647	1927.53
20	0.00025182	0.000270454	2043.33		20	0.000196984	0.000211561	1893.63		20	0.000236305	0.000253791	1899.74		20	0.000267647	0.000287453	2062.94
21	0.000270454	0.000290097	2043.33		21	0.000211561	0.000226926	1893.63		21	0.000253791	0.000272224	1899.74		21	0.000287453	0.00030833	2062.94
22	0.000290097	0.000310863	2150.32		22	0.000226926	0.000243169	2013.72		22	0.000272224	0.00029171	2021.67		22	0.00030833	0.000330401	2175.87
23	0.000310863	0.000332887	2150.32		23	0.000243169	0.000260398	2013.72		23	0.00029171	0.000312378	2021.67		23	0.000330401	0.00035381	2175.87
24	0.000332887	0.000356334	2234.24		24	0.000260398	0.000278739	2113.67		24	0.000312378	0.00033438	2124.25		24	0.00035381	0.00037873	2262.15
25	0.000356334	0.000381399	2234.24		25	0.000278739	0.000298346	2113.67		25	0.00033438	0.000357901	2124.25		25	0.00037873	0.000405371	2262.15
26	0.000381399	0.000408323	2289.63		26	0.000298346	0.000319407	2185.02		26	0.000357901	0.000383165	2200.42		26	0.000405371	0.000433986	2316.42
27	0.000408323	0.000437402	2289.63		27	0.000319407	0.000342154	2185.02		27	0.000383165	0.000410453	2200.42		27	0.000433986	0.000464893	2316.42
28	0.000437402	0.000469013	2309.19		28	0.000342154	0.000366881	2218.39		28	0.000410453	0.000440116	2240.45		28	0.000464893	0.000498491	2330.81
29	0.000469013	0.000503639	2309.19		29	0.000366881	0.000393967	2218.39		29	0.000440116	0.000472609	2240.45		29	0.000498491	0.000535294	2330.81
30	0.000503639	0.000541917	2281.91		30	0.000393967	0.000423909	2201.53		30	0.000472609	0.000508528	2229.32		30	0.000535294	0.000575977	2293.22
31	0.000541917	0.000584707	2281.91		31	0.000423909	0.000457382	2201.53		31	0.000508528	0.000548682	2229.32		31	0.000575977	0.000621457	2293.22
32	0.000584707	0.000633219	2189.92		32	0.000457382	0.00049533	2116.51		32	0.000548682	0.000594205	2142.58		32	0.000621457	0.000673018	2183.92
33	0.000633219	0.000689222	2189.92		33	0.00049533	0.000539138	2116.51		33	0.000594205	0.000646757	2142.58		33	0.000673018	0.00073254	2183.92
34	0.000689222	0.000755459	2001.94		34	0.000539138	0.000590951	1934.23		34	0.000646757	0.000708914	1939.2		34	0.00073254	0.000802941	1968.93
35	0.000755459	0.000836527	2001.94		35	0.000590951	0.000654366	1934.23		35	0.000708914	0.000784987	1939.2		35	0.000802941	0.000889104	1968.93
36	0.000836527	0.000941041	1658.72		36	0.000654366	0.000736121	1600.55		36	0.000784987	0.000883062	1549.27		36	0.000889104	0.00100019	1587.93
37	0.000941041	0.00108835	1658.72		37	0.000736121	0.000851349	1600.55		37	0.000883062	0.00102129	1549.27		37	0.00100019	0.00115675	1587.93
38	0.00108835	0.00134017	1253.96		38	0.000851349	0.00104833	1211.99		38	0.00102129	0.0012576	1103.13		38	0.00115675	0.0014244	1157.17
39	0.00134017	inf	1253.96		39	0.00104833	inf	1211.99		39	0.0012576	inf	1103.13		39	0.0014244	inf	1157.17
French					Sardinian					Karitiana					Yoruba
time_index	left_time_boundary	right_time_boundary	lambda_00		time_index	left_time_boundary	right_time_boundary	lambda_00		time_index	left_time_boundary	right_time_boundary	lambda_00		time_index	left_time_boundary	right_time_boundary	lambda_00
0	0	1.01321e-05	1840.27		0	0	9.82597e-06	2932.05		0	0	7.3957e-06	26709.2		0	0	1.34546e-05	1751.41
1	1.01321e-05	2.05275e-05	15908.8		1	9.82597e-06	1.99072e-05	13863		1	7.3957e-06	1.49835e-05	21880.2		1	1.34546e-05	2.72588e-05	2981.13
2	2.05275e-05	3.12001e-05	14203.7		2	1.99072e-05	3.02573e-05	15401		2	1.49835e-05	2.27737e-05	23612.9		2	2.72588e-05	4.14311e-05	2819.49
3	3.12001e-05	4.21651e-05	6419.85		3	3.02573e-05	4.0891e-05	7165.5		3	2.27737e-05	3.07773e-05	14117		3	4.14311e-05	5.59917e-05	1780.01
4	4.21651e-05	5.34391e-05	3205.98		4	4.0891e-05	5.18242e-05	3562.1		4	3.07773e-05	3.90064e-05	7326.2		4	5.59917e-05	7.09625e-05	1363.72
5	5.34391e-05	6.50398e-05	2050.44		5	5.18242e-05	6.30744e-05	2233.02		5	3.90064e-05	4.74741e-05	4247.7		5	7.09625e-05	8.63674e-05	1203.59
6	6.50398e-05	7.69869e-05	1578.12		6	6.30744e-05	7.46605e-05	1681.61		6	4.74741e-05	5.61946e-05	2856.14		6	8.63674e-05	0.000102232	1157.62
7	7.69869e-05	8.93017e-05	1367.88		7	7.46605e-05	8.66031e-05	1432.25		7	5.61946e-05	6.51834e-05	2165.42		7	0.000102232	0.000118585	1173.18
8	8.93017e-05	0.000102007	1277.53		8	8.66031e-05	9.8925e-05	1321.25		8	6.51834e-05	7.44577e-05	1789.48		8	0.000118585	0.000135457	1225.09
9	0.000102007	0.00011513	1250.98		9	9.8925e-05	0.000111651	1283.3		9	7.44577e-05	8.40361e-05	1572.43		9	0.000135457	0.000152883	1299.33
10	0.00011513	0.000128697	1282.15		10	0.000111651	0.000124808	1304.39		10	8.40361e-05	9.39392e-05	1410.52		10	0.000152883	0.000170899	1435.19
11	0.000128697	0.000142741	1282.15		11	0.000124808	0.000138427	1304.39		11	9.39392e-05	0.00010419	1410.52		11	0.000170899	0.000189548	1435.19
12	0.000142741	0.000157295	1387.43		12	0.000138427	0.000152542	1399.06		12	0.00010419	0.000114813	1352.72		12	0.000189548	0.000208874	1626.49
13	0.000157295	0.000172399	1387.43		13	0.000152542	0.000167189	1399.06		13	0.000114813	0.000125838	1352.72		13	0.000208874	0.000228931	1626.49
14	0.000172399	0.000188095	1531.36		14	0.000167189	0.000182411	1534.16		14	0.000125838	0.000137295	1398.47		14	0.000228931	0.000249774	1811.06
15	0.000188095	0.000204432	1531.36		15	0.000182411	0.000198254	1534.16		15	0.000137295	0.00014922	1398.47		15	0.000249774	0.000271468	1811.06
16	0.000204432	0.000221464	1688.65		16	0.000198254	0.000214772	1686.45		16	0.00014922	0.000161652	1501.49		16	0.000271468	0.000294085	1975.98
17	0.000221464	0.000239253	1688.65		17	0.000214772	0.000232024	1686.45		17	0.000161652	0.000174637	1501.49		17	0.000294085	0.000317708	1975.98
18	0.000239253	0.000257871	1844.78		18	0.000232024	0.000250078	1841.57		18	0.000174637	0.000188226	1634.62		18	0.000317708	0.00034243	2115.4
19	0.000257871	0.000277396	1844.78		19	0.000250078	0.000269014	1841.57		19	0.000188226	0.000202478	1634.62		19	0.00034243	0.000368359	2115.4
20	0.000277396	0.000297924	1990.66		20	0.000269014	0.000288921	1988.85		20	0.000202478	0.000217462	1779.22		20	0.000368359	0.000395618	2226.3
21	0.000297924	0.000319562	1990.66		21	0.000288921	0.000309905	1988.85		21	0.000217462	0.000233256	1779.22		21	0.000395618	0.000424351	2226.3
22	0.000319562	0.000342436	2119.23		22	0.000309905	0.000332088	2119.72		22	0.000233256	0.000249952	1920.88		22	0.000424351	0.000454726	2306.34
23	0.000342436	0.000366698	2119.23		23	0.000332088	0.000355617	2119.72		23	0.000249952	0.000267662	1920.88		23	0.000454726	0.000486944	2306.34
24	0.000366698	0.000392526	2223.45		24	0.000355617	0.000380665	2226.65		24	0.000267662	0.000286514	2046.87		24	0.000486944	0.000521242	2352.56
25	0.000392526	0.000420137	2223.45		25	0.000380665	0.000407441	2226.65		25	0.000286514	0.000306668	2046.87		25	0.000521242	0.000557906	2352.56
26	0.000420137	0.000449795	2295		26	0.000407441	0.000436203	2301.74		26	0.000306668	0.000328316	2144.19		26	0.000557906	0.00059729	2360.21
27	0.000449795	0.000481828	2295		27	0.000436203	0.000467268	2301.74		27	0.000328316	0.000351698	2144.19		27	0.00059729	0.000639827	2360.21
28	0.000481828	0.00051665	2322.68		28	0.000467268	0.000501038	2334.54		28	0.000351698	0.000377115	2197.53		28	0.000639827	0.000686067	2321.16
29	0.00051665	0.000554793	2322.68		29	0.000501038	0.000538028	2334.54		29	0.000377115	0.000404957	2197.53		29	0.000686067	0.000736718	2321.16
30	0.000554793	0.000596958	2289.66		30	0.000538028	0.000578919	2308.84		30	0.000404957	0.000435734	2186.51		30	0.000736718	0.000792709	2221.72
31	0.000596958	0.000644095	2289.66		31	0.000578919	0.000624631	2308.84		31	0.000435734	0.00047014	2186.51		31	0.000792709	0.000855303	2221.72
32	0.000644095	0.000697534	2168.53		32	0.000624631	0.000676455	2197.41		32	0.00047014	0.000509146	2082.19		32	0.000855303	0.000926265	2040.18
33	0.000697534	0.000759225	2168.53		33	0.000676455	0.000736282	2197.41		33	0.000509146	0.000554176	2082.19		33	0.000926265	0.00100819	2040.18
34	0.000759225	0.000832189	1913.68		34	0.000736282	0.000807042	1953.8		34	0.000554176	0.000607435	1843.39		34	0.00100819	0.00110508	1746.69
35	0.000832189	0.000921491	1913.68		35	0.000807042	0.000893645	1953.8		35	0.000607435	0.000672618	1843.39		35	0.00110508	0.00122366	1746.69
36	0.000921491	0.00103662	1456.9		36	0.000893645	0.0010053	1505.05		36	0.000672618	0.000756654	1417.25		36	0.00122366	0.00137654	1312.68
37	0.00103662	0.00119889	1456.9		37	0.0010053	0.00116266	1505.05		37	0.000756654	0.000875096	1417.25		37	0.00137654	0.00159202	1312.68
38	0.00119889	0.00147628	975.063		38	0.00116266	0.00143167	1018.42		38	0.000875096	0.00107757	978.161		38	0.00159202	0.00196038	904.056
39	0.00147628	inf	975.063		39	0.00143167	inf	1018.42		39	0.00107757	inf	978.161		39	0.00196038	inf	904.056

## Sheet: Fig 4a
Results of the selection scan
Chr	bp	Dsel
1	846864	0.0432361
1	850062	0.056122
1	909363	-0.0155291
1	917060	0.068583
1	930751	0.0730199
1	931508	0.0343623
1	941101	0
1	954032	-0.101813
1	968226	-0.0621637
1	975133	0.0472482
1	992511	0.00429529
1	994391	0.038044
1	1014864	-0.0338431
1	1026707	0.0236005
1	1033680	0.00826017
1	1034689	0.00826017
1	1039098	0.0271406
1	1042927	0.0855282
1	1049523	0.0224677
1	1062638	0.058718
1	1065131	0
1	1077064	-0.0417729
1	1090557	-0.0224677
1	1097335	-0.00415369
1	1099342	0.0142547
1	1109315	0.0434249
1	1110991	-0.0795337
1	1122283	0.016898
1	1123434	0.0642405
1	1130727	0.0262437
1	1131236	0.0211932
1	1131419	-0.0111866
1	1135242	0.0488058
1	1166177	-0.0266214
1	1193476	-0.00278486
1	1193713	0.00377608
1	1193723	0.00377608
1	1205155	0.0136411
1	1206343	-0.00693854
1	1209539	-0.0566884
1	1212795	-0.0477202
1	1213224	-0.0557916
1	1213266	0.0046729
1	1215849	0.00316247
1	1254069	0.0046729
1	1254171	0.0046729
1	1269076	0
1	1275716	0.0108562
1	1331833	-0.0108562
1	1483276	-0.0104786
1	1504671	0.0383744
1	1517618	0.0383744
1	1519068	-0.181629
1	1529000	-0.0340319
1	1529998	0.0212876
1	1559209	0.0046729
1	1582609	0
1	1692046	0.0046729
1	1760989	-0.0340791
1	1767565	0.0431889
1	1768660	-0.0340791
1	1776269	0.028206
1	1829424	0.0813745
1	1836686	-0.0340791
1	1843579	0.0950156
1	1861126	-0.0271406
1	1865293	0
1	1870761	-0.0430473
1	1872578	0.0046729
1	1875432	-0.0523931
1	1879563	0.00193524
1	1882960	0.0957708
1	1886115	-0.102898
1	1909553	0.121023
1	1909733	-0.125696
1	1914605	-0.0348208
1	1916587	-0.110922
1	1917449	-0.110922
1	1923558	0.00934579
1	1925996	0.0046729
1	1926518	0.0046729
1	1929834	0.105258
1	1930391	0.109931
1	1930805	0.120032
1	1931195	0.120032
1	1938695	0
1	1942033	0.031247
1	1944852	0
1	1948400	-0.00146323
1	1971871	-0.0495138
1	1975434	0.0362504
1	1984811	0.158926
1	2014567	0
1	2044018	0.0046729
1	2051513	-0.00325687
1	2071340	0.0640517
1	2082814	0.00934579
1	2083537	0.0640517
1	2090095	0.0640517
1	2149138	0.103606
1	2164935	0.0734919
1	2165918	0.0421977
1	2184692	0.0351175
1	2189196	0.0446049
1	2200390	-0.0282734
1	2219613	-0.0337959
1	2221222	-0.086189
1	2231567	0.0925611
1	2231966	-0.0244501
1	2245701	0.0046729
1	2248624	0.0160955
1	2269671	0.0046729
1	2287848	-0.0280846
1	2287900	0
1	2291514	0
1	2293724	0
1	2293791	0
1	2298494	0.0938828
1	2300157	0.00906259
1	2337537	0.00325687
1	2338126	0.129331
1	2358092	0.0505523
1	2375844	0.0933163
1	2390333	0
1	2390715	0.0695742
1	2394226	0.0553668
1	2436404	-0.0104786
1	2454930	0.0551307
1	2475212	-0.00391768
1	2498618	-0.0349759
1	2513055	-0.0256301
1	2524915	0.0237893
1	2528999	-0.0548475
1	2532899	-0.0237893
1	2533250	-0.0237893
1	2533552	0.0237893
1	2708518	0.0310582
1	2709164	-0.0284622
1	2723214	-0.0282734
1	2723552	-0.011989
1	2730661	-0.0260077
1	2746442	0.0127443
1	2753379	0
1	2756621	0.069055
1	2756807	0.069055
1	2756889	0.069055
1	2761863	0.0681582
1	2765873	0.0926083
1	2796001	0
1	2798335	0.0963372
1	2823506	-0.0403568
1	2835487	-0.0126971
1	2837578	-0.122675
1	2840925	-0.144765
1	2843428	-0.144388
1	2848363	-0.0174172
1	2849190	-0.0385632
1	2853499	0.0046729
1	2861387	0.0046729
1	2861394	0.0046729
1	2862695	0.0046729
1	2867830	0.0046729
1	2877477	0.00934579
1	2898515	0
1	2904145	0
1	2914618	-0.0173228
1	2917460	0.0219957
1	2919123	0.0046729
1	2920733	0
1	2923384	-0.0173228
1	2923400	0.0046729
1	2926168	0.0046729
1	2931327	0.0173228
1	2933853	0
1	2936746	0.0148683
1	2937312	0.0046729
1	2943183	0.0148683
1	2944671	-0.0148683
1	2949607	-0.0148683
1	2951034	0.0148683
1	2951768	0.0280374
1	2959266	-0.00542811
1	2991808	-0.00278486
1	3020246	-0.0539979
1	3030624	0.0569716
1	3039148	-0.0100538
1	3045892	0.0951572
1	3049381	-0.016898
1	3050594	-0.016898
1	3051040	-0.016898
1	3052265	0.0219485
1	3062875	0.0927499
1	3067705	0.00405928
1	3076857	0.101152
1	3078949	0.0046729
1	3080855	0.087133
1	3080940	0.087133
1	3083246	0.0824601
1	3083381	-0.0205796
1	3093332	0
1	3099138	0.0573964
1	3101762	0.0437553
1	3103312	0.0142075
1	3105563	0.0753092
1	3107386	-0.0267158
1	3120632	-0.0168744
1	3127064	0.0810913
1	3127137	0.0810913
1	3131738	0.0558388
1	3133307	-0.040404
1	3146191	-0.0884782
1	3146554	-0.0519683
1	3147885	-0.156754
1	3147909	-0.147409
1	3172763	-0.0121779
1	3178111	-0.0466346
1	3178629	0
1	3184855	0.0572548
1	3188143	-0.0516851
1	3195550	0
1	3203121	0.00934579
1	3211458	-0.121543
1	3212591	-0.103276
1	3220209	0.00934579
1	3225633	0
1	3225757	0.0339375
1	3226137	0
1	3226539	0.0203436
1	3226854	0.0184556
1	3226863	0.00934579
1	3227170	0.0184556
1	3228363	0.0184556
1	3243017	-0.00823657
1	3283658	-0.0193052
1	3292984	0.00934579
1	3301130	0.0246861
1	3303545	0
1	3305096	0.01973
1	3312914	-0.121401
1	3321167	-0.0151515
1	3325721	-0.0151515
1	3325722	-0.0151515
1	3337356	0
1	3342804	-0.0830265
1	3344127	-0.028651
1	3345145	0.182985
1	3348268	0.076324
1	3372471	0.0103842
1	3374384	0.0103842
1	3400075	0
1	3400294	-0.0114698
1	3428424	0.0316247
1	3439069	0
1	3441308	0
1	3448867	-0.0340555
1	3455329	0
1	3470869	0.0199188
1	3473155	0.0220901
1	3474777	0
1	3476279	0.126971
1	3489626	0.0166619
1	3493850	0.0484282
1	3510633	0.0582932
1	3518728	0.0799989
1	3526711	-0.00226565
1	3529613	0
1	3538480	0.0157179
1	3556067	0
1	3564231	0.00302086
1	3564818	-0.00302086
1	3576351	-0.232795
1	3576662	0.0165675
1	3580812	-0.240867
1	3589001	-0.156282
1	3629272	-0.105353
1	3637613	-0.0138299
1	3653412	0.0642405
1	3654747	-0.0141603
1	3668781	0.0799113
1	3680656	0
1	3683690	0.122345
1	3684954	0.0344095
1	3691727	-0.0106674
1	3695645	0
1	3697486	-0.0296422
1	3698224	-0.00136883
1	3698836	0.0296422
1	3699568	0.0999717
1	3702648	-0.0438969
1	3709110	-0.0623525
1	3720323	0.0594732
1	3727157	0.0444161
1	3739160	0
1	3740553	0
1	3748513	0.0142075
1	3756530	0.0142075
1	3760670	-0.0142075
1	3761465	0.074908
1	3765671	0.0546115
1	3769365	-0.0547059
1	3770450	0.0546115
1	3773733	0.0140659
1	3781830	0.0892099
1	3783278	0.0807609
1	3787196	0.0545643
1	3788437	0.0440385
1	3792801	-0.0186444
1	3794421	-0.00505051
1	3796022	-0.0100538
1	3796134	-0.0100538
1	3796948	-0.0100538
1	3800054	0.00934579
1	3811790	0.00283206
1	3814883	0.00283206
1	4000957	0.00934579
1	4005045	-0.0263381
1	4008337	-0.0233173
1	4012862	0
1	4013602	0.0527235
1	4014328	0.0527235
1	4021585	0
1	4023533	0.018314
1	4026838	0.121023
1	4028854	0.0140187
1	4039145	0.0905787
1	4063124	0
1	4063747	0.0238365
1	4066680	-0.0455961
1	4066781	0.0797225
1	4069878	0.120646
1	4069975	-0.106627
1	4071150	0.0983129
1	4071335	0.120646
1	4074015	-0.106627
1	4075969	-0.0983668
1	4076044	0.120646
1	4076798	-0.106627
1	4077291	-0.0983668
1	4078945	0.0735391
1	4082085	0.0835929
1	4084304	-0.0785424
1	4087765	0.0785896
1	4088339	0.0692438
1	4089697	0.00358727
1	4092671	0.00358727
1	4096028	-0.0480978
1	4097543	-0.0480978
1	4097561	-0.00505051
1	4099687	0.00278486
1	4101354	-0.0480978
1	4103685	0
1	4103776	0
1	4105421	0.0793449
1	4115928	0.0550835
1	4119578	-0.0400736
1	4120499	0.0691022
1	4129247	0.0575852
1	4130601	0.011753
1	4130602	0.011753
1	4131602	0.0210988
1	4132126	0.0575852
1	4132573	0.0575852
1	4140030	0.0705183
1	4141194	-0.0587652
1	4152928	-0.0822713
1	4153087	0.0284622
1	4158955	0.113896
1	4170249	0.0356839
1	4190685	-0.0440385
1	4195955	-0.0227037
1	4196817	-0.0128859
1	4196818	0.0893515
1	4197072	0.0413009
1	4202461	0.0413009
1	4206415	-0.0656094
1	4207525	-0.000188804
1	4214727	0.0349287
1	4215918	0.0349287
1	4230599	-0.00505051
1	4232798	-0.0398848
1	4233528	0.02091
1	4238650	-0.0581516
1	4252994	0.24672
1	4260627	0.0463514
1	4262269	0
1	4269491	0.254319
1	4271526	0.217927
1	4272139	0.0578684
1	4276888	0.0549419
1	4283315	0.0276598
1	4285697	0.137308
1	4288512	0.0422449
1	4288760	0.00783536
1	4291953	0.170348
1	4292358	0.0278486
1	4299727	0.0283206
1	4312148	0.0329935
1	4312425	0.0329935
1	4313166	0
1	4317771	0.0329935
1	4318097	0
1	4325239	-0.0283206
1	4325569	0.0489474
1	4325824	0
1	4333076	-0.0430945
1	4339392	0
1	4339602	0.077268
1	4339652	-0.077268
1	4341599	0
1	4342680	0
1	4343134	0.0654678
1	4343398	0
1	4343531	0
1	4343545	0
1	4343930	0.0654678
1	4345034	0
1	4345062	0.077268
1	4345708	0
1	4346339	0.077268
1	4346656	-0.077268
1	4346988	0.0434721
1	4348074	0.0136411
1	4350859	0
1	4351903	0.0136411
1	4355493	-0.0663174
1	4359230	0
1	4363735	-0.074908
1	4364941	-0.009393
1	4368304	0.00382328
1	4380344	0.0930331
1	4381253	0.0533843
1	4381388	0
1	4384773	0.0185972
1	4389199	-0.0890211
1	4393893	0.0738291
1	4394512	-0.0764656
1	4395675	0
1	4395812	-0.0764656
1	4396200	0
1	4398057	-0.0770792
1	4399103	-0.0576257
1	4402822	0.0050033
1	4404414	0.0909563
1	4404639	-0.00320967
1	4415502	-0.00320967
1	4419820	-0.0501746
1	4420408	-0.149391
1	4420492	-0.149391
1	4421811	-0.0984612
1	4424242	-0.0984612
1	4425079	-0.169027
1	4426807	0
1	4434295	-0.0337015
1	4436285	-0.0475314
1	4437518	0
1	4444185	-0.0104786
1	4446996	-0.0383744
1	4449500	-0.0104786
1	4451565	-0.0104786
1	4451848	0.0396488
1	4452157	0.0104786
1	4452360	0
1	4452404	-0.0104786
1	4454512	0.0477202
1	4455696	0.00372888
1	4461002	0.0209572
1	4461065	-0.0209572
1	4461578	0.0209572
1	4462460	0.00372888
1	4462997	-0.0209572
1	4463585	0.011281
1	4463753	-0.0209572
1	4471434	-0.0322383
1	4472448	-0.138016
1	4474973	-0.0209572
1	4475184	-0.165345
1	4475214	-0.0209572
1	4477392	-0.163646
1	4478039	-0.175068
1	4487044	0.0302558
1	4487102	-0.0256301
1	4490137	-0.0256301
1	4491778	-0.0256301
1	4492001	-0.141886
1	4502705	-0.0471538
1	4502781	0.0471538
1	4509379	-0.0188332
1	4521485	-0.0974228
1	4525682	0.0147031
1	4529576	0
1	4538620	0.039932
1	4541043	0.0541867
1	4541390	0.0588596
1	4549307	0.0873218
1	4566053	0.0211932
1	4578849	0.0993581
1	4581338	0.0993581
1	4591085	0.0614085
1	4596751	0.0224205
1	4597462	0.0893043
1	4598001	0.00528651
1	4599121	0.0224205
1	4599686	0.0893043
1	4600199	0.0893043
1	4600491	0.0323799
1	4603324	0.0063519
1	4603942	0.0140187
1	4604489	0.0327575
1	4605188	-0.0302558
1	4609081	0.0846314
1	4612366	0.0730671
1	4614021	-0.00741055
1	4619393	-0.0353535
1	4620996	0.0134523
1	4624663	0.0795809
1	4626267	-0.0686302
1	4627482	0.0156235
1	4630384	0.101152
1	4632828	-0.0235061
1	4633404	0.0046729
1	4643472	0.0543755
1	4648925	-0.0048145
1	4653661	0
1	4656147	0.123855
1	4664614	0.0160483
1	4667996	-0.00339847
1	4677330	0.068347
1	4677535	-0.0880298
1	4678829	0.068347
1	4679460	0.068347
1	4679563	0.0207212
1	4682803	0.0186916
1	4685871	-0.0822241
1	4687310	0
1	4687814	0.0208156
1	4725381	0
1	4736456	0.0705655
1	4736774	-0.0771264
1	4737493	-0.0247333
1	4737624	-0.0297838
1	4737658	-0.0297838
1	4739318	0.114698
1	4743629	0.0297838
1	4746513	-0.0297838
1	4748305	0.0675918
1	4757642	0
1	4769825	-0.04064
1	4780750	-0.0379968
1	4781259	-0.0612197
1	4794286	0.109931
1	4805106	-0.185594
1	4814117	0.0162371
1	4816202	-0.259464
1	4822273	0.240867
1	4822740	-0.025529
1	4830829	0.174077
1	4833498	-0.0571604
1	4838146	0.166518
1	4851545	0.183423
1	4856169	-0.0906259
1	4858666	-0.000755216
1	4865318	0
1	4867549	-0.0550835
1	4872075	-0.000755216
1	4877043	-0.0776456
1	4880917	-0.000755216
1	4883025	0.0729727
1	4884058	0.058246
1	4887910	-0.0908147
1	4888012	-0.0169452
1	4889912	-0.0721231
1	4900223	-0.0554612
1	4901737	0.170018
1	4902990	0.0132635
1	4904019	0
1	4904740	0.0152931
1	4912677	0.00505051
1	4913147	0.00505051
1	4913499	0.0132635
1	4913559	0.168366
1	4915221	0
1	4926950	0.18668
1	4928187	0.0322787
1	4928560	-0.00505051
1	4929689	0.18668
1	4938194	0
1	4946250	-0.185453
1	4946252	0.0321439
1	4954775	-0.235061
1	4956555	-0.246625
1	4956628	0
1	4964568	-0.0335127
1	4978187	-0.0202492
1	4981574	0.0160483
1	4983743	0.010573
1	4983840	0.0160483
1	4984667	0.010573
1	4985037	0.0947324
1	4985926	0.0113754
1	4987424	-0.031247
1	4996307	-0.0383272
1	5002053	0.0792032
1	5011382	0.0784952
1	5015035	0.123525
1	5016315	-0.159964
1	5022944	-0.00505051
1	5025029	0.0370056
1	5025139	0.0370056
1	5026910	0.0370056
1	5027479	0.037336
1	5028464	0.0889739
1	5030255	0.0246861
1	5042093	-0.00547531
1	5043734	-0.0347939
1	5060046	0
1	5061491	0.0233645
1	5066205	0.0204852
1	5080433	-0.132918
1	5086371	0.0496554
1	5086707	0.129944
1	5089048	0
1	5090161	-0.0842538
1	5091232	0.0617861
1	5093741	0.170962
1	5100704	-0.101341
1	5126014	0.0836401
1	5127480	0
1	5130281	0.0707543
1	5141318	-0.00542811
1	5141454	0.0414425
1	5142552	-0.076324
1	5142981	0.0761352
1	5143708	0.00382328
1	5145444	0
1	5149683	-0.00915699
1	5152000	0
1	5162707	-0.0319551
1	5162735	0
1	5163625	0.0220429
1	5170691	0.116917
1	5171994	0.0337959
1	5181565	0
1	5186510	0.0148683
1	5187279	0.10304
1	5202016	0
1	5205326	-0.0314831
1	5205542	0
1	5206542	0
1	5208483	0
1	5210124	0.0576796
1	5215915	0
1	5215962	0.0584348
1	5218689	0
1	5219505	0
1	5233991	0.0438025
1	5234335	0.0680166
1	5239791	-0.0248277
1	5246626	0.0513075
1	5251569	0.0419617
1	5256774	-0.0441565
1	5262534	0
1	5279241	0.00792976
1	5287159	0.0706599
1	5291489	0.00580572
1	5291879	-0.0694916
1	5293685	-0.0706599
1	5300124	-0.0504578
1	5302004	-0.00660814
1	5302118	-0.0349287
1	5302984	0.0302558
1	5309520	-0.018078
1	5309567	-0.0285566
1	5312038	0.0351647
1	5312989	0.0272822
1	5313445	0.0391768
1	5316813	0.018314
1	5321622	0.127207
1	5323589	0
1	5327338	0.0333239
1	5327732	0.129755
1	5328815	0.0257245
1	5329459	0
1	5330559	0.0303974
1	5330757	-0.0303974
1	5335194	-0.0993581
1	5341296	-0.145898
1	5344728	-0.00368168
1	5344974	0.0114698
1	5347979	0.180591
1	5351147	-0.0584348
1	5351622	0.14283
1	5351892	0.0721231
1	5353875	-0.0317663
1	5353877	-0.14283
1	5354266	-0.070734
1	5354399	0
1	5355695	-0.0267158
1	5356607	-0.0499724
1	5357171	0.0832625
1	5361947	0.036628
1	5362103	0.0185972
1	5362292	-0.0381654
1	5368747	0.0312943
1	5369566	0.0312943
1	5371159	0.0359671
1	5378108	0.00934579
1	5379032	0.00934579
1	5383411	0.00934579
1	5391497	0.0358727
1	5401914	0.0261493
1	5411660	0.0438025
1	5425109	0.0484754
1	5425401	0.0436609
1	5425753	0.0438025
1	5434356	0
1	5471302	0
1	5475259	0.0816577
1	5475663	0.0277542
1	5479861	-0.00405928
1	5489867	-0.00599452
1	5492043	0.0890683
1	5493392	0.133579
1	5495836	-0.0229869
1	5500677	-0.133579
1	5503281	0
1	5503408	0
1	5507379	0
1	5518310	0
1	5519522	0.00934579
1	5521656	0.00934579
1	5539191	0
1	5541205	-0.0297434
1	5542812	0.0309638
1	5553268	0.00250165
1	5556950	-0.0256773
1	5558726	0.0126499
1	5562108	0
1	5563419	0
1	5568501	0
1	5581424	0
1	5591238	0
1	5598722	-0.101246
1	5598726	-0.101246
1	5598945	-0.126593
1	5600482	0
1	5601422	0
1	5603539	-0.101246
1	5604016	-0.07538
1	5610810	0
1	5611999	0
1	5632929	-0.0954404
1	5635316	0.0134995
1	5637582	9.4402e-05
1	5637882	0
1	5638398	0.0766072
1	5638751	-0.0379968
1	5639701	0.0410649
1	5640228	0.0410649
1	5644564	0
1	5645776	0
1	5646024	0.0421977
1	5648870	0
1	5651462	0
1	5661009	0.00287926
1	5671757	-0.0376192
1	5675494	0.0792437
1	5679118	-0.15633
1	5679127	-0.15633
1	5679733	-0.00523931
1	5679763	-0.133012
1	5680231	0.179883
1	5683507	0.0599452
1	5684831	-0.00632493
1	5689330	0.0164259
1	5691704	0.0125083
1	5692235	0.00854338
1	5695089	-0.00920419
1	5695474	0.00854338
1	5696117	-0.00920419
1	5696551	-0.0516379
1	5696625	0.00854338
1	5698007	0.0601813
1	5699475	0.0135939
1	5699859	0.0046729
1	5700615	-0.00415369
1	5707091	0.0424337
1	5718749	-0.0265674
1	5733297	0.0327103
1	5734256	0.00505051
1	5744963	0.0627773
1	5745349	-0.0122723
1	5770265	-0.0369112
1	5771142	0.0322383
1	5777940	0.0709903
1	5779050	-0.0272822
1	5790320	0.0691022
1	5790330	0.0691022
1	5795966	-0.0484518
1	5796934	0.00391768
1	5798896	0.00391768
1	5800047	0.0383744
1	5806349	0.102049
1	5811124	0.0269518
1	5811751	0.00934579
1	5819554	0.00934579
1	5829776	0.00934579
1	5830815	-0.0188804
1	5830967	-0.0282262
1	5842744	0
1	5845785	0
1	5845846	0.0674502
1	5858943	0.0959124
1	5861151	0.0046729
1	5864237	0
1	5876249	0.0771264
1	5876480	0
1	5883361	-0.00188804
1	5888555	0.0472482
1	5902050	0.303597
1	5902761	0.0942604
1	5921042	-0.00674974
1	5922078	0.0157179
1	5923788	0.0491362
1	5959301	0.0370528
1	5967051	0
1	5971243	0.0552251
1	5972365	-0.0147267
1	5978977	-0.0123667
1	5992880	0
1	6009296	-0.0447465
1	6014858	0.0144435
1	6027167	0.00552251
1	6031944	0.0148683
1	6036341	0.0993109
1	6039633	-0.0046257
1	6059229	-0.0103842
1	6073439	0.0884074
1	6073519	0.0812329
1	6080378	0.0977532
1	6108377	-0.124044
1	6112653	-0.0910979
1	6118190	0.00934579
1	6123467	0.00934579
1	6123628	0.0186916
1	6125084	-0.0903427
1	6135207	-0.109034
1	6137403	-0.118002
1	6141261	-0.020438
1	6199677	0.0840177
1	6204222	-0.0317191
1	6207098	0
1	6222501	0.196309
1	6231873	0
1	6233006	0.0122723
1	6237105	0.0327103
1	6242232	0
1	6243085	-0.0491362
1	6254056	0
1	6259764	0.00934579
1	6260663	0.09629
1	6266793	0.0495138
1	6274304	0.0409233
1	6279562	0.0140187
1	6283062	0.0549419
1	6286421	0.0476258
1	6287543	0.0476258
1	6288891	0.0663174
1	6291048	0.0140187
1	6294128	0.0140187
1	6315617	0.0046729
1	6316106	0
1	6316884	0.0306334
1	6336665	0
1	6343714	0.0646653
1	6346453	0.0186916
1	6346641	0.0164259
1	6357712	0.115973
1	6363163	0.0164259
1	6367284	0.0395544
1	6367780	0
1	6375056	0.121401
1	6378036	0.0125083
1	6379220	0.0186916
1	6384999	0.0693382
1	6388589	0.011753
1	6395591	0.0599924
1	6408505	0.0214764
1	6409653	0.0214764
1	6409662	0.0214764
1	6413154	0.0214764
1	6415805	0.0599924
1	6418218	0.0599924
1	6418612	0.0599924
1	6419893	0.0210988
1	6450664	0.13542
1	6458498	0.048381
1	6459141	0.13542
1	6461695	0.0319551
1	6462225	0.0737751
1	6470875	0.0319551
1	6493838	0.0524403
1	6494743	0.019966
1	6498162	0.048381
1	6521150	0.0641933
1	6523578	-0.0227037
1	6529748	0.0339847
1	6529823	0.040168
1	6560363	-0.0375248
1	6564141	-0.00273766
1	6568950	-0.0312943
1	6579653	-0.0654745
1	6581030	0
1	6584045	0.0788256
1	6584420	0.0834985
1	6585209	0
1	6599362	0.0737751
1	6599768	0.0788256
1	6609559	0.10068
1	6612933	0.0935995
1	6620890	-0.00429529
1	6620942	0.0046729
1	6621229	0
1	6623122	0.0960068
1	6639757	0.0046729
1	6661732	0.00118002
1	6669970	0.107807
1	6672729	0.0984612
1	6676485	0.0992165
1	6678864	0.017134
1	6705571	0.00155763
1	6705874	0.121165
1	6721234	0.077268
1	6747897	0.0180308
1	6750113	-0.121165
1	6756002	0.111819
1	6771607	0.0181724
1	6785946	-0.0539035
1	6793240	-0.0227037
1	6801175	0.0362504
1	6802182	0.0362504
1	6811095	0.0582932
1	6812373	0.0582932
1	6818673	0.0582932
1	6826571	-0.0361088
1	6828180	0.0314359
1	6828825	0.0582932
1	6830347	0.0361088
1	6831062	0.0536203
1	6848505	0.0283678
1	6897161	-0.0430338
1	6936201	0.0724063
1	6977200	0.0098178
1	6981541	0.0376192
1	6989652	0.0382328
1	7004012	0.0257245
1	7006698	-0.0257245
1	7037045	0.130275
1	7041685	0.0471066
1	7078434	0.056122
1	7091845	0.151279
1	7095270	0.108704
1	7105315	0.00453129
1	7108567	0
1	7111328	-0.0272822
1	7113907	0.0280374
1	7128870	0.0186916
1	7128871	0
1	7129620	0.122392
1	7131336	0.148919
1	7146575	-0.00726895
1	7148546	-0.00726895
1	7149407	0.00821297
1	7167031	0.0557916
1	7179861	0.154489
1	7191251	0.123053
1	7214374	0.124563
1	7219781	0.0966676
1	7222042	0.138252
1	7236247	0
1	7245434	0.0806665
1	7245922	0.0799113
1	7256943	0.0046729
1	7282162	0
1	7283536	0.00934579
1	7285296	0.00934579
1	7287106	0.00934579
1	7297400	0.0046729
1	7308211	0.00934579
1	7310510	0.0046729
1	7311260	-0.0262909
1	7314409	0.00934579
1	7317758	0.0928443
1	7323971	-0.027471
1	7336754	0
1	7336765	0
1	7338717	0.0205324
1	7339608	0
1	7339915	0
1	7371360	0.0725479
1	7372744	-0.00660814
1	7387641	0
1	7389944	-0.0278486
1	7396041	0.0276598
1	7406079	0.0459266
1	7410182	-0.0459266
1	7428707	0
1	7431662	0.00896819
1	7438408	0.000566412
1	7439015	0.00915699
1	7440602	0
1	7448713	-0.0379496
1	7450006	-0.0319079
1	7457459	0.00372888
1	7459753	0.0280374
1	7478521	0.0280374
1	7482173	0
1	7487156	-0.00424809
1	7489979	-0.0045785
1	7492616	0.0333239
1	7492991	0.0172756
1	7497467	-0.010101
1	7504141	-0.0127443
1	7509608	0.0732559
1	7520247	0.114982
1	7526187	0.154206
1	7534039	0.0804777
1	7534756	0.0544699
1	7536743	0.0173228
1	7539530	0.0783064
1	7540699	0.0362504
1	7540862	0.129425
1	7552501	0.110214
1	7560647	0.0980364
1	7560649	0.0980364
1	7566146	-0.0823185
1	7566491	0
1	7568982	0.00698575
1	7569187	0.0174644
1	7571771	0.00774096
1	7577138	0
1	7578948	-0.00618333
1	7579923	0.0612669
1	7580454	-0.0221845
1	7580769	0.0221845
1	7584814	-0.019022
1	7586658	0.0186444
1	7586771	-0.0050033
1	7587581	0.0229869
1	7596383	0.0207212
1	7604269	-0.000330407
1	7604460	0
1	7609809	0
1	7611415	0
1	7614672	0.0178892
1	7616866	0.0463042
1	7621589	0.10337
1	7624855	-0.0557444
1	7626995	0
1	7629593	0
1	7629730	0
1	7631349	0
1	7635253	0
1	7642029	0
1	7642030	0
1	7642031	0
1	7644802	0.0690078
1	7644821	0
1	7645216	0
1	7645229	0
1	7670217	0.0182668
1	7670574	0.0182668
1	7672748	0.0140187
1	7672794	0.0140187
1	7678253	0.0140187
1	7682618	0
1	7683756	-0.0135939
1	7688668	-0.0354007
1	7697179	0.0046729
1	7761650	0.0405456
1	7770236	0
1	7774797	-0.0295006
1	7800385	-0.0648541
1	7801167	0.0648541
1	7805208	0.069527
1	7812840	0.0836873
1	7818318	0
1	7834532	-0.261257
1	7837878	0.221703
1	7846527	-0.076088
1	7854998	-0.0944964
1	7858135	-0.216653
1	7860380	-0.0760408
1	7861600	0.0976588
1	7863944	0
1	7865036	0.0198716
1	7883358	-0.0317663
1	7886116	-0.0252997
1	7914066	-0.0877871
1	7918598	-0.123761
1	7921207	-0.203719
1	7922261	0.135703
1	7923727	-0.199047
1	7934887	-0.011989
1	7936272	-0.111583
1	7941852	0.138393
1	7942373	0.00708015
1	7944900	0.00934579
1	7960311	0.0218541
1	7969166	0.00934579
1	7969331	0.00934579
1	7974481	0
1	7987071	0.0362504
1	7987689	0.0362504
1	7988503	0.0362504
1	7989632	0
1	7990093	0
1	7999716	0
1	8001466	0.0362504
1	8001581	0
1	8008366	-0.142925
1	8016867	0.0046729
1	8022197	-0.203011
1	8028074	0
1	8034892	0
1	8042402	-0.203011
1	8042826	-0.193666
1	8059030	0
1	8061681	0
1	8062949	0
1	8073929	0
1	8079389	0
1	8094200	0.0046729
1	8095360	0
1	8095500	-0.188993
1	8106987	0.00934579
1	8114808	0
1	8124315	0.0110922
1	8128653	0
1	8134117	0.00934579
1	8142787	0.0046729
1	8152102	0.164118
1	8159137	0
1	8159908	0
1	8161296	0
1	8165975	-0.0653194
1	8168261	-0.164118
1	8168917	-0.0653194
1	8170709	0
1	8174083	-0.0177004
1	8175560	0.00934579
1	8176250	0.00934579
1	8179392	-0.159445
1	8179744	-0.159445
1	8181107	0.00934579
1	8184231	-0.100491
1	8184303	-0.0954404
1	8184307	0.0640045
1	8185177	0.048853
1	8186947	-0.113424
1	8188123	0.0364864
1	8206326	0.173936
1	8213028	0
1	8214803	0.149816
1	8215507	0.114226
1	8246289	0.0472954
1	8249555	0.0359199
1	8251938	0.0444633
1	8255618	0.0397904
1	8261130	0.00934579
1	8261393	0.0106674
1	8264112	0.0637213
1	8266294	0.0276598
1	8271108	0.00934579
1	8271562	0.0370056
1	8271818	0.00934579
1	8273177	-0.00712735
1	8274765	0.0838289
1	8278218	0.0141131
1	8281207	0.0449353
1	8281954	0.0449353
1	8284018	0.0449353
1	8284657	0.0449353
1	8285186	0.0573964
1	8286260	0.0542811
1	8286261	0.0542811
1	8296550	0.0198716
1	8297758	0.0372416
1	8297858	-0.0893987
1	8300252	-0.0570188
1	8307849	-0.131455
1	8308828	0.0776928
1	8311053	0.0557444
1	8316732	-0.0942604
1	8317691	0.136552
1	8323162	0.125319
1	8326572	0.145521
1	8330628	0.00934579
1	8346464	0
1	8346671	0
1	8350003	0
1	8352039	0.0101482
1	8355420	0
1	8355467	-0.0665534
1	8367704	-0.000573155
1	8369692	0
1	8374884	0
1	8375913	0.0944492
1	8380054	0.0402152
1	8383469	-0.122723
1	8409672	0.00405928
1	8412652	0
1	8418110	0
1	8431105	0.0366752
1	8434939	0
1	8435046	0.0992165
1	8439625	0.0318607
1	8455712	0.0366752
1	8457623	0.0316247
1	8469284	0.0318607
1	8480205	0
1	8481016	0.118191
1	8486131	0.0318607
1	8488018	0
1	8490320	0.0369112
1	8491688	0
1	8498572	0
1	8504421	0.108468
1	8513878	0.00179364
1	8515364	0
1	8535164	0.0528179
1	8548777	0
1	8557320	0.143302
1	8557691	0.147975
1	8569871	0.143302
1	8581015	0.0323799
1	8586563	0.110922
1	8596893	0.143302
1	8612104	0.147975
1	8613418	0.143302
1	8614571	0.110922
1	8616404	0.0370528
1	8616838	0.147975
1	8634894	0
1	8640895	0
1	8677143	0
1	8686272	0
1	8701752	0
1	8728978	0.128151
1	8732454	0.118805
1	8740545	0
1	8753217	0
1	8805436	0
1	8807909	0
1	8812390	0.113377
1	8825804	0
1	8882664	0.0924195
1	8885551	0.0924195
1	8909389	0
1	8910232	0
1	8910578	0.0428585
1	8910705	0.0428585
1	8912917	0
1	8913181	-0.0525819
1	8913612	0.0424809
1	8914717	0.00934579
1	8917102	-0.00429529
1	8917212	0.0428585
1	8917815	-0.00429529
1	8918774	0
1	8920712	-0.0323799
1	8928125	-0.0230341
1	8946053	0
1	8947825	0
1	8954530	0.0347534
1	8957317	0
1	8959481	0
1	8959483	0
1	8959599	0
1	8959603	0
1	8959898	0
1	8962305	0
1	8965739	0
1	8975507	-0.0110922
1	8978646	-0.0440385
1	8980579	-0.0250637
1	8991911	-0.0664118
1	8995697	0
1	8997651	0
1	8999843	0.00764656
1	9000628	0.00514491
1	9005269	0.0046729
1	9008370	0.0136883
1	9009352	0
1	9009444	-0.0664118
1	9009470	0.0329935
1	9010984	-0.0572076
1	9011328	0.0046729
1	9011722	-0.0135939
1	9013992	0.0513075
1	9020983	0.0233645
1	9023572	-0.0421033
1	9023829	0
1	9028172	0.086189
1	9029134	0
1	9032275	0
1	9043483	-0.0997357
1	9045359	0.0568772
1	9046050	0
1	9046643	-0.0279902
1	9055054	0
1	9061161	-0.0313415
1	9063602	0.0617389
1	9083094	0
1	9088224	0
1	9094882	-0.0537147
1	9096050	-0.0537147
1	9096405	-0.00528651
1	9116899	0.0365808
1	9118596	-0.0355423
1	9122645	0.0354951
1	9126111	-0.0505523
1	9127216	-0.0806665
1	9138467	0.00585292
1	9158132	0.0473898
1	9165818	0.0539507
1	9194614	0.0333239
1	9206736	-0.0244029
1	9227200	-0.116114
1	9230071	0
1	9234363	-0.0340319
1	9235117	-0.0463042
1	9243702	0
1	9243811	0.0268574
1	9247319	-0.0589068
1	9249616	0.0214292
1	9251399	-0.010101
1	9254856	0.0101954
1	9255119	-0.0101954
1	9260900	0.0277542
1	9267900	0.0315303
1	9269187	0.0214292
1	9270072	-0.059898
1	9270797	-0.0283678
1	9279017	0.0327103
1	9283333	-0.0130275
1	9288466	-0.156141
1	9290532	-0.156518
1	9296152	0
1	9300568	0.0373832
1	9301701	0
1	9309746	-0.116398
1	9311025	0.0373832
1	9327413	0.0302558
1	9327433	0
1	9327949	0.0511187
1	9331629	0.0856698
1	9331973	0.0856698
1	9333273	-0.143666
1	9334270	0
1	9335054	-0.0432833
1	9342203	0.100538
1	9354520	-0.00674974
1	9354740	0
1	9360359	-0.0296894
1	9363098	0.00934579
1	9363106	0.00934579
1	9378729	-0.00542811
1	9379741	-0.0280846
1	9387490	-0.268479
1	9388428	-0.00542811
1	9395125	-0.00542811
1	9395207	-0.075616
1	9395394	-0.0940244
1	9396716	0
1	9396718	-0.0893515
1	9404367	0.0324743
1	9408285	0.0731615
1	9408959	0.048381
1	9412610	0.0276126
1	9416747	0.077504
1	9420541	0.0157179
1	9428685	-0.0365808
1	9431123	0.0259605
1	9434584	0.0606533
1	9441106	0
1	9446877	0
1	9447854	0
1	9458793	-0.0159539
1	9463254	0.125366
1	9463424	0
1	9484523	0.110167
1	9485464	-0.113613
1	9490768	-0.019022
1	9490784	-0.019022
1	9495100	0.00873218
1	9503449	0.0729727
1	9509821	-0.00118002
1	9510088	0.00155763
1	9511569	0.0111866
1	9513234	0
1	9525764	0.0849146
1	9532826	0
1	9541585	0.0228925
1	9555003	0.0329935
1	9563315	-0.0222789
1	9564824	0
1	9569752	-0.00542811
1	9570724	0.0177948
1	9578233	0
1	9586731	0
1	9586732	0
1	9592170	0.0369584
1	9593797	0.0369584
1	9597847	-0.0268574
1	9613518	0.0188804
1	9657216	0
1	9670738	0
1	9681485	-0.0299726
1	9685107	0.0119418
1	9686627	0
1	9718187	-0.00623053
1	9722841	-0.00646653
1	9726537	0
1	9743308	0
1	9743622	-0.0558388
1	9745202	-0.0499454
1	9771789	-0.0159067
1	9786270	0.00429529
1	9786304	-0.020202
1	9813643	0.000613613
1	9825377	0
1	9856826	0
1	9868660	0
1	9894081	-0.0146323
1	9897001	-0.0507411
1	9902900	0.066223
1	9910357	-0.00736335
1	9915016	0.0159067
1	9916036	0
1	9922250	-0.0159067
1	9924945	-0.0159067
1	9924957	-0.00698575
1	9930994	0
1	9937113	0
1	9958594	-0.0189748
1	9960385	-0.0159067
1	9966377	0.0159067
1	9976099	0
1	9985665	-0.0134051
1	9999539	0.0157179
1	10001980	0.011045
1	10001981	-0.0253941
1	10003457	-0.0118946
1	10011071	0.010809
1	10023391	0.0227037
1	10037468	-0.0097706
1	10073980	0
1	10079557	-0.00302086
1	10093974	0
1	10094447	0.00934579
1	10122779	-0.0202492
1	10148447	0
1	10165301	-0.0608893
1	10183729	0
1	10183830	0.0420561
1	10195970	-0.0410649
1	10196734	-0.0104786
1	10210971	0.0489002
1	10222323	-0.0104786
1	10230506	0.0160483
1	10233943	0.0160483
1	10262021	-0.0132163
1	10266081	-0.0556972
1	10267202	-0.0228925
1	10267390	0.0228925
1	10271540	0.0356839
1	10293159	0
1	10295079	0
1	10296518	0.00708015
1	10308631	0.0135467
1	10311116	0.0135467
1	10323973	0.0189748
1	10327366	0
1	10327407	0.0286982
1	10330290	0
1	10345325	-0.0135467
1	10350849	0.0135467
1	10359944	0.0193996
1	10371524	0.00240725
1	10371645	0
1	10378416	-0.030121
1	10378451	0.0434721
1	10400602	-0.00703295
1	10400990	0.0240253
1	10404183	0.00240725
1	10407169	-0.0155291
1	10439306	0
1	10447581	0
1	10447792	-0.0155291
1	10448260	-0.0248749
1	10463888	-0.0104786
1	10474352	0
1	10479635	-0.0104786
1	10481475	0.00236005
1	10492168	-0.0598508
1	10505366	0
1	10507047	0
1	10537201	0
1	10537906	-0.0166619
1	10539503	0
1	10540240	0
1	10554709	-0.00221845
1	10563671	-0.0491834
1	10566095	-0.0227981
1	10571841	-0.0213348
1	10579650	0.000424809
1	10593541	-0.031011
1	10593547	0
1	10597053	0
1	10606996	-0.031011
1	10608257	-0.0213348
1	10609973	0.0159539
1	10613344	-0.031011
1	10617351	-0.0213348
1	10631764	-0.0213348
1	10631811	-0.0338903
1	10633421	-0.0498442
1	10638741	0
1	10642793	-0.00287926
1	10645656	0.0532427
1	10653628	0.00401208
1	10656351	-0.0214292
1	10702618	-0.0613141
1	10704547	-0.0166619
1	10737442	0.103795
1	10740444	0.103795
1	10740626	-0.010101
1	10743083	0
1	10747048	-0.0682998
1	10750394	0
1	10800852	0.0046729
1	10825334	0.212829
1	10845821	0.0555084
1	10850844	0.0317191
1	10858084	0
1	10858746	-0.0100066
1	10862323	0.0145379
1	10863212	0.0145379
1	10863728	0
1	10863927	0.00986501
1	10867778	0
1	10869052	-0.0240725
1	10874152	0.00429529
1	10882157	0.0606533
1	10897814	0
1	10900237	-0.0102898
1	10902514	0
1	10905090	-0.0656566
1	10906056	0
1	10907729	0.00146323
1	10921903	-9.4402e-05
1	10924988	0.104031
1	10928206	0.0854338
1	10933361	0.00934579
1	10940761	-0.0776456
1	10941670	-0.0776456
1	10956251	-0.0411593
1	10964544	0
1	10976715	0
1	10978325	-0.066695
1	10979684	-0.105319
1	10981610	0
1	10988493	-0.114274
1	10990512	0.109601
1	10991450	0.03828
1	11002579	-0.0189276
1	11002858	-0.0189276
1	11003749	-0.0189276
1	11007072	-0.0189276
1	11016378	-0.074672
1	11017026	-0.00136883
1	11020460	0
1	11020461	0
1	11022292	-0.0275182
1	11027415	0
1	11028631	0.0161427
1	11032479	0.0046729
1	11032827	0.057774
1	11033051	-0.0385632
1	11034347	0.0123195
1	11035085	0.0046729
1	11035126	0.0628245
1	11037459	0
1	11040714	-0.040404
1	11045633	0
1	11046855	-0.0557444
1	11046868	0.0557444
1	11046909	0.0557444
1	11047634	-0.0557444
1	11048973	-0.037808
1	11050459	-0.103276
1	11052262	-0.00151043
1	11067982	0.00207684
1	11078312	0.0688662
1	11079579	0.0280374
1	11088216	0
1	11090916	0.0839166
1	11091783	0
1	11093629	0.0742943
1	11107439	0.0876994
1	11123720	0
1	11126569	-0.0667422
1	11127764	-0.0667422
1	11130116	-0.0667422
1	11134494	0.00745776
1	11136206	0.00745776
1	11141030	0.00745776
1	11176208	0.00278486
1	11179962	0.00278486
1	11184212	0
1	11193401	0.00278486
1	11200416	0.00278486
1	11214560	0.00278486
1	11231984	0.00278486
1	11252689	0.00278486
1	11252947	0.00278486
1	11264828	0.00278486
1	11269917	0.055886
1	11273418	0.00278486
1	11278225	0.00278486
1	11288633	-0.0609365
1	11290341	-0.0609365
1	11292952	0.055886
1	11293792	0.055886
1	11301841	0.00278486
1	11305385	0.00278486
1	11325867	-0.00731615
1	11328955	-0.0278958
1	11332184	-0.0232229
1	11360977	-0.0232229
1	11362548	0
1	11363832	0
1	11386669	0.0046729
1	11402065	-0.0505051
1	11406448	0.0186916
1	11408657	0
1	11420234	0.00339847
1	11421233	0
1	11422283	0
1	11428191	0.00934579
1	11428502	0
1	11433598	0
1	11438344	0.199991
1	11443562	0.168211
1	11446799	0
1	11446910	0.0046729
1	11449982	0.0510243
1	11453271	0.204286
1	11456881	0.147456
1	11458876	0
1	11459017	-0.134476
1	11467354	0.171717
1	11476574	-0.121212
1	11477341	-0.00769376
1	11480809	-0.0290286
1	11483850	0.122487
1	11484403	0
1	11486210	0.13221
1	11486815	-0.0175588
1	11488203	-0.118805
1	11488767	0
1	11490744	0.0171812
1	11490914	0.0121307
1	11495157	0
1	11501805	0.097234
1	11502829	0.07538
1	11514684	0
1	11519153	0
1	11519457	0
1	11520977	0.109081
1	11531303	0
1	11542957	0.0699991
1	11545846	0.0541395
1	11546592	0
1	11550647	-0.0640045
1	11553456	0.0681582
1	11553547	0.0634853
1	11554962	-0.0634853
1	11556282	0
1	11560954	0
1	11575753	0
1	11577093	0
1	11599428	0.0355895
1	11599541	-0.0355895
1	11599661	-0.0355895
1	11599665	-0.0355895
1	11618592	0.0280374
1	11619177	-0.0130747
1	11625977	0.0636269
1	11627722	-0.0402624
1	11632874	0.0233645
1	11637127	0
1	11637407	0.302558
1	11648847	0.0280374
1	11653480	-0.106485
1	11662760	-0.0910979
1	11680914	0
1	11688387	0.0193996
1	11703866	-0.0202492
1	11706478	0.0203436
1	11719617	0
1	11729310	0.0452185
1	11730803	0.0452185
1	11745196	-0.0544632
1	11749957	0.0804777
1	11753958	0.0202964
1	11754168	0.057538
1	11759835	0.0364864
1	11759892	-0.00745776
1	11767866	0
1	11773579	0.00571132
1	11783484	0.129331
1	11783776	0.12428
1	11802434	-0.0531955
1	11815364	0.101577
1	11832100	-0.0354479
1	11835455	-0.0658926
1	11837649	0.0658926
1	11839201	0.0658926
1	11843632	0.0298782
1	11852241	0
1	11871207	0
1	11873547	0
1	11873869	-0.0436609
1	11881320	0.0966676
1	11892615	-0.0530067
1	11895667	0.0171812
1	11896827	0.0156707
1	11898130	0.0339375
1	11899033	0.00108562
1	11899561	0
1	11900825	0.0328519
1	11920189	-0.00825343
1	11921181	0.0805249
1	11925789	0.00934579
1	11926721	-0.0108562
1	11934890	0.0128859
1	11935723	0.0047201
1	11936324	0.211791
1	11977398	0.0663174
1	11990197	-0.0651846
1	12004442	0
1	12008897	-0.0682998
1	12018887	0
1	12021485	0.00934579
1	12022791	0.000849618
1	12042012	0
1	12046334	0.144671
1	12056075	0
1	12070572	0
1	12101252	0.0650902
1	12105332	0.0604173
1	12109126	0
1	12113953	-0.119654
1	12113954	-0.119654
1	12131292	0.0046729
1	12137603	-0.0813745
1	12138351	0.0046729
1	12183245	0.143161
1	12188651	-0.0376664
1	12189233	-0.0376664
1	12193527	-0.0270462
1	12194789	0.0049443
1	12195224	0.0118946
1	12203601	0
1	12206866	0.151043
1	12217690	0
1	12217852	0.237657
1	12224000	0.0171812
1	12224239	0.0171812
1	12225351	0.028651
1	12240722	0.0458322
1	12245708	-0.00726895
1	12248291	0.0212876
1	12248425	0.0212876
1	12248739	0
1	12249643	0.0205324
1	12249865	-0.0205324
1	12250894	0
1	12251765	0.0508355
1	12251808	0.0999245
1	12252955	-0.000391094
1	12277664	-0.0339375
1	12282122	-0.0456906
1	12284534	-0.0464458
1	12306734	-0.0460682
1	12314878	-0.0492306
1	12319994	-0.0561692
1	12320949	-0.00113282
1	12342599	-0.030539
1	12354175	-0.00113282
1	12372331	-0.00693854
1	12376779	-0.00226565
1	12379789	-0.00693854
1	12382353	-0.0165203
1	12412799	-0.0142547
1	12422263	0
1	12426234	0
1	12429088	0
1	12450829	0.0049561
1	12465434	0
1	12483677	-0.0153875
1	12488475	-0.0189276
1	12520905	0
1	12551237	0
1	12564127	0
1	12567900	-0.0247333
1	12572850	-0.00580572
1	12573988	-0.00844898
1	12576740	-0.00415369
1	12577446	-0.00264325
1	12583190	-0.011989
1	12596355	-0.0506939
1	12597490	0
1	12606725	0.0490418
1	12615888	-0.0750968
1	12626182	-0.027707
1	12626593	0.00811857
1	12627680	0.011989
1	12628942	0.0308222
1	12633052	0.0154347
1	12641488	-0.00113282
1	12671265	0
1	12671324	0.031247
1	12671685	0.0335599
1	12674271	-0.0547531
1	12675736	-0.00590012
1	12681146	0
1	12683017	-0.00122723
1	12683190	0.0776456
1	12684837	-0.0835457
1	12685318	-0.0882186
1	12685925	-0.0869914
1	12692391	0.0327103
1	12694363	0.0046729
1	12696044	0.0280374
1	12699828	0.0233645
1	12702017	-0.0170396
1	12704466	-0.0170396
1	12707265	-0.0123667
1	12720275	-0.0123667
1	12725222	0
1	12728153	-0.020438
1	12737395	-0.020438
1	12737629	-0.0153875
1	12740907	-0.0604645
1	12743966	-0.0511187
1	12763781	-4.7201e-05
1	12764919	-0.038988
1	12781278	0
1	12782991	-0.0542339
1	12785093	-0.0384688
1	12785494	-0.049561
1	12788790	-0.049561
1	12792636	-0.0157651
1	12796044	0.0337959
1	12797022	-0.049561
1	12798493	-0.0157651
1	12800288	-0.0157651
1	12802806	-0.0157651
1	12802955	0.0448881
1	12804285	0
1	12804789	0.0503162
1	12806178	0
1	12806196	-0.0211932
1	12807277	0
1	12919963	-0.0440385
1	12923014	0.125649
1	12923209	-0.00523931
1	13188257	0.144671
1	13804340	0.0128859
1	13805742	0
1	13807158	0.0315303
1	13808955	-0.100302
1	13813462	0
1	13820826	0
1	13822639	0
1	13825513	0.0259133
1	13826935	-0.0438969
1	13828265	-0.00632493
1	13834449	-0.0497026
1	13834809	0.00797697
1	13837629	0.00292646
1	13841780	0.0273766
1	13842025	-0.0248277
1	13847083	-0.0232229
1	13852276	0.0132635
1	13854682	0.0118946
1	13855758	0.109081
1	13861526	0.0193524
1	13861563	0.0193524
1	13861990	-0.00387048
1	13863776	0
1	13866873	0
1	13869259	0
1	13872403	0.0757104
1	13873005	0.014929
1	13876264	-0.0636741
1	13883988	0.0135467
1	13887751	0.107524
1	13897945	0.0436609
1	13899004	-0.0244029
1	13913550	-0.00405928
1	13914831	-0.0177948
1	13915681	0.0352591
1	13917652	0.0336543
1	13919357	0.059898
1	13920807	0.0467762
1	13935174	-0.0385632
1	13935402	0.0432361
1	13936822	-0.0292174
1	13937089	-0.0292174
1	13938377	-0.11045
1	13940119	0
1	13940264	0
1	13940478	0
1	13942293	0
1	13948047	0
1	13948121	0.00934579
1	13948225	-0.0976588
1	13952864	0.0731143
1	13963869	0.0230813
1	13965618	0.0219485
1	13970508	-0.0266214
1	13970950	0.0266214
1	13976699	0
1	13977327	-0.0137355
1	14008734	0.0929859
1	14029158	-0.0162843
1	14031756	0.00259605
1	14039269	-0.0104786
1	14045394	0.00259605
1	14087114	0.00651374
1	14096457	0.066459
1	14096635	-0.109054
1	14118779	0.0944964
1	14120250	0.107052
1	14126361	0.0328047
1	14134154	-0.0738223
1	14141988	0.0501746
1	14148441	-0.0237893
1	14149197	-0.0237893
1	14149505	-0.00320967
1	14154723	-0.0708959
1	14157624	0.046021
1	14162680	-0.010809
1	14164286	0.00438969
1	14170060	0.0436137
1	14172251	0.0622109
1	14182517	0
1	14185277	0
1	14193487	-0.00934579
1	14209659	-0.0323327
1	14210266	0.00429529
1	14211629	0.0272822
1	14213210	-0.00113282
1	14214306	-0.0522043
1	14227230	0.0675918
1	14227867	0.0452051
1	14228340	-0.00580572
1	14228490	-0.122817
1	14230131	0.00896819
1	14232061	0.119324
1	14238945	-0.0522043
1	14240350	-0.0522043
1	14245266	-0.0137355
1	14252372	-0.0424337
1	14252557	-0.0540923
1	14254636	-0.0400399
1	14259077	0
1	14261897	-0.0738223
1	14261909	-0.0738223
1	14267917	0
1	14270180	-0.0121307
1	14270876	-0.0121307
1	14274203	0.0210044
1	14274232	0.0210044
1	14275026	0.00382328
1	14289509	-0.00745776
1	14290194	0.0355423
1	14292022	0.0355423
1	14294749	0.0141603
1	14295888	0.0569716
1	14296513	0.0522987
1	14299650	0.0254413
1	14300004	0.0254413
1	14300012	0.0254413
1	14305286	-0.00236005
[truncated: 63,536 more rows]

## Sheet: Fig 4b
	Depigmentation allele frequencies
		Populations
	Genes	WHG	SHG	EHG	FIN	CEU
	OCA2/HERC2	0.888889	0.9375	0.333333	0.9	0.76
	SLC45A2	0	0.555556	0.666667	0.95	0.97
	SLC24A5	0.0714286	0.625	1	0.988	1

## Sheet: S2 Fig
D(Chimp, WHG; SHG_swe, SHG_nor)
		SHG_swe	SHG_nor	D	Error
Chimp	WHG	sf12	H22	-0.031432	0.0102919
Chimp	WHG	sf12	H26	-0.0269406	0.00756176
Chimp	WHG	sf12	stg001	-0.0283354	0.00811444
Chimp	WHG	sbj001	H22	-0.0371186	0.0193965
Chimp	WHG	sbj001	H26	-0.0225081	0.0121524
Chimp	WHG	sbj001	stg001	-0.0340308	0.013384
Chimp	WHG	sf11	H22	0.028605	0.0306366
Chimp	WHG	sf11	H26	0.0118543	0.0192583
Chimp	WHG	sf11	stg001	0.0175845	0.0208623
Chimp	WHG	sf9	H22	-0.0560291	0.0150448
Chimp	WHG	sf9	H26	-0.0465325	0.0098661
Chimp	WHG	sf9	stg001	-0.0455361	0.0110792
Chimp	WHG	Motala1	H22	-0.0383899	0.0146417
Chimp	WHG	Motala1	H26	-0.0234255	0.0102489
Chimp	WHG	Motala1	stg001	-0.0310328	0.0104768
Chimp	WHG	Motala2	H22	-0.0490042	0.0132565
Chimp	WHG	Motala2	H26	-0.0323674	0.00927984
Chimp	WHG	Motala2	stg001	-0.0361692	0.00997233
Chimp	WHG	Motala3	H22	-0.01564	0.0231792
Chimp	WHG	Motala3	H26	-0.0128178	0.0134735
Chimp	WHG	Motala3	stg001	-0.0239783	0.01391
Chimp	WHG	Motala4	H22	-0.0418136	0.0145549
Chimp	WHG	Motala4	H26	-0.0351771	0.00927246
Chimp	WHG	Motala4	stg001	-0.0341719	0.009915
Chimp	WHG	Motala6	H22	-0.0289991	0.0149027
Chimp	WHG	Motala6	H26	-0.027027	0.0104724
Chimp	WHG	Motala6	stg001	-0.0217485	0.0115708
Chimp	WHG	Motala12	H22	-0.0369805	0.0122943
Chimp	WHG	Motala12	H26	-0.0252634	0.00864282
Chimp	WHG	Motala12	stg001	-0.0246647	0.00906499
D(Chimp, EHG; SHG_swe, SHG_nor)
		SHG_swe	SHG_nor	D	Error
Chimp	EHG	sf12	H22	0.0122962	0.011578
Chimp	EHG	sf12	H26	0.0164539	0.00878995
Chimp	EHG	sf12	stg001	0.0204537	0.0090096
Chimp	EHG	sbj001	H22	0.0372509	0.0222534
Chimp	EHG	sbj001	H26	0.0366485	0.0143199
Chimp	EHG	sbj001	stg001	0.0306052	0.015777
Chimp	EHG	sf11	H22	0.108787	0.0380746
Chimp	EHG	sf11	H26	0.0792867	0.0230392
Chimp	EHG	sf11	stg001	0.0899009	0.0255127
Chimp	EHG	sf9	H22	0.00826164	0.0185923
Chimp	EHG	sf9	H26	0.0152514	0.0120851
Chimp	EHG	sf9	stg001	0.0175908	0.0128391
Chimp	EHG	Motala1	H22	0.0146192	0.0172928
Chimp	EHG	Motala1	H26	0.00658837	0.0112043
Chimp	EHG	Motala1	stg001	0.0087434	0.0115835
Chimp	EHG	Motala2	H22	0.00527886	0.0148931
Chimp	EHG	Motala2	H26	0.0194597	0.0102689
Chimp	EHG	Motala2	stg001	0.0195213	0.0107708
Chimp	EHG	Motala3	H22	0.0356053	0.0243505
Chimp	EHG	Motala3	H26	0.026897	0.0148232
Chimp	EHG	Motala3	stg001	0.00875477	0.0151029
Chimp	EHG	Motala4	H22	0.00869123	0.0148601
Chimp	EHG	Motala4	H26	0.00334804	0.010019
Chimp	EHG	Motala4	stg001	0.0084795	0.0107131
Chimp	EHG	Motala6	H22	0.0125908	0.0165778
Chimp	EHG	Motala6	H26	0.00984781	0.0114927
Chimp	EHG	Motala6	stg001	0.0125153	0.0124401
Chimp	EHG	Motala12	H22	0.0107463	0.0142109
Chimp	EHG	Motala12	H26	0.0216767	0.0101156
Chimp	EHG	Motala12	stg001	0.0227483	0.0102803

## Sheet: S3 Fig
Additional information for S3 Fig. F4 values can be found in Fig 1c, Radiocarbon dates are shown in Table 1
Individual	Longitude
sf12	18
H22	7.44
H26	7.44
sbj001	18.5
sf11	18
sf9	18
stg001	14.85
Motala1	15.05
Motala2	15.05
Motala3	15.05
Motala4	15.05
Motala6	15.05
Motala12	15.05
Zv313	26.2
Zv93	26.2
Zv121	26.2

[truncated: 8 more sheets: S4 Fig - Sardinian, S4 Fig - Karitiana, S4 Fig - Yoruba, S4 Fig - French, S4 Fig Stuttgart, S4 Fig - Loschbour, S4 Fig - Ust_Ishim, S4 Fig - SF12]
